# Supplementary material for: Abordagem de temas bioéticos a partir da visão de diferentes denominações religiosas
Source: Royal Society of Chemistry journal article supplement (doi:10.1039/c8ra04086a), 2005-01-01
Supplement: c8ra04086a1.pdf [file c8ra04086a1.pdf]

## Supporting Information

### **1,2,3-Triazole based bisphosphine, 5-(diphenylphosphanyl)-1-(2-(diphenylphosphanyl)-phenyl)-4-phenyl-1H-1,2,3-triazole: An ambidentate ligand with switchable coordination modes**

Latchupatula Radhakrishna, Madhusudan K. Pandey and Maravanji S. Balakrishna\*  
*Phosphorus Laboratory, Department of Chemistry, Indian Institute of Technology Bombay,  
Powai, Mumbai 400076, India.*

1. Synthesis of chalcogenide derivatives of **2**
2. NMR spectral data of compounds **a-i** and **k**.
3. Computational Details
4. NMR and mass spectra of compounds **2** and **4-12**
5. NMR spectra of compounds **a-i** and **k**
6. Cartesian coordinates of optimized geometries of **3-6**

---

\*Author to whom correspondence should be addressed. E-mail: [krishna@chem.iitb.ac.in](mailto:krishna@chem.iitb.ac.in), [msb\\_krishna@iitb.ac.in](mailto:msb_krishna@iitb.ac.in) (M. S. Balakrishna); Fax: +91-22-5172-3480/2576-7152.

### (1). Synthesis of chalcogenide derivatives of **2**

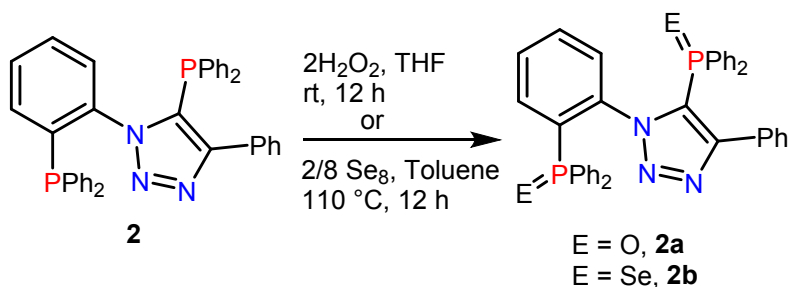

#### Scheme S1 Synthesis of chalcogenide derivatives of **2**

##### Synthesis of [*o*-Ph<sub>2</sub>P(O)(C<sub>6</sub>H<sub>4</sub>){1,2,3-N<sub>3</sub>C(Ph)C((O)PPh<sub>2</sub>)}] (**2a**)

A 30% aqueous solution of H<sub>2</sub>O<sub>2</sub> (0.0064 g, 0.102 mmol) was added to a THF (10 mL) solution of **2** (0.03 g, 0.051 mmol) at room temperature. The reaction mixture was stirred for 12 h. The solvent was removed under vacuum and residue washed with diethyl ether to obtain analytically pure solid compound **2a**. Yield 92 % (0.029 g). <sup>1</sup>H NMR (400 MHz, CDCl<sub>3</sub>) δ 7.73 (dd, *J* = 12.0, 7.7 Hz, 4H), 7.68 – 7.58 (m, 5H), 7.57 – 7.43 (m, 8H), 7.37 (t, *J* = 7.6 Hz, 1H), 7.24 – 7.09 (m, 8H), 7.05 (q, *J* = 6.0 Hz, 3H). <sup>31</sup>P NMR (162 MHz, CDCl<sub>3</sub>) δ 28.52, 12.75. HRMS (ES) *m/z* calcd for C<sub>38</sub>H<sub>30</sub>N<sub>3</sub>P<sub>2</sub>O<sub>2</sub> ([M+H]<sup>+</sup>) 622.1808; found 622.1809.

##### Synthesis of [*o*-Ph<sub>2</sub>P(Se)(C<sub>6</sub>H<sub>4</sub>){1,2,3-N<sub>3</sub>C(Ph)C((Se)PPh<sub>2</sub>)}] (**2b**)

The round bottom flask charged with bisphosphine ligand **2** (0.03 g, 0.051 mmol) and Se<sub>8</sub> (8.8 mg, 0.0139 mmol) in Toluene (15 mL) at room temperature. The reaction mixture was refluxed for 12 h and excess of se was filtered off through celite containing frit. The solvent was completely removed under reduced pressure and residue was washed with petroleum ether to obtain analytically pure solid compound **2b**. Yield: 93 % (0.035 g) <sup>1</sup>H NMR (400 MHz, CDCl<sub>3</sub>) δ 8.29 (d, *J* = 10.4 Hz, 2H), 8.19 (dd, *J* = 7.6, 4.4 Hz, 1H), 8.04 (dd, *J* = 14.6, 7.6 Hz, 2H), 7.80 – 7.69 (m, 4H), 7.50 (dd, *J* = 25.9, 14.6 Hz, 8H), 7.36 (t, *J* = 7.7 Hz, 1H), 7.20 – 7.06 (m, 7H), 7.06 – 6.99

(m, 3H), 6.88 (dd,  $J = 13.4, 6.8$  Hz, 1H).  $^{31}\text{P}$  NMR (202 MHz,  $\text{CDCl}_3$ )  $\delta$  31.70 (s), 18.53(s). HRMS (ES)  $m/z$  calcd for  $\text{C}_{38}\text{H}_{30}\text{N}_3\text{P}_2\text{Se}_2$  ( $[\text{M}+\text{H}]^+$ ) 750.0248; found 750.0284.

## (2). NMR spectral data of compounds a-i and k

### a. 2-phenylbenzofuran.<sup>1</sup>

$^1\text{H}$  NMR (500 MHz,  $\text{CDCl}_3$ )  $\delta$  7.93 – 7.84 (m, 2H), 7.62 – 7.57 (m, 1H), 7.56 – 7.51 (m, 1H), 7.46 (dd,  $J = 10.6, 4.8$  Hz, 2H), 7.39 – 7.33 (m, 1H), 7.32 – 7.27 (m, 1H), 7.27 – 7.21 (m, 1H), 7.04 (d,  $J = 0.6$  Hz, 1H).  $^{13}\text{C}$  NMR (126 MHz,  $\text{CDCl}_3$ )  $\delta$  156.10, 155.07, 130.66, 129.40, 128.97, 128.73, 125.11, 124.44, 123.11, 121.08, 111.36, 101.48.4

### b. 2-(2-methoxyphenyl)benzofuran<sup>2</sup>

$^1\text{H}$  NMR (400 MHz,  $\text{CDCl}_3$ )  $\delta$  8.09 (dd,  $J = 7.8, 1.7$  Hz, 1H), 7.64 – 7.58 (m, 1H), 7.53 (d,  $J = 8.0$  Hz, 1H), 7.39 – 7.36 (m, 1H), 7.36 – 7.31 (m, 1H), 7.31 – 7.26 (m, 1H), 7.23 (dd,  $J = 10.8, 4.1$  Hz, 1H), 7.10 (td,  $J = 7.7, 0.8$  Hz, 1H), 7.02 (d,  $J = 8.3$  Hz, 1H), 4.01 (s, 3H).  $^{13}\text{C}$  NMR (101 MHz,  $\text{CDCl}_3$ )  $\delta$  156.69, 153.52, 152.35, 129.98, 129.43, 127.25, 124.28, 122.81, 121.21, 120.97, 119.53, 111.22, 111.01, 106.50, 55.64.

### c. 2-(4-methoxyphenyl)benzofuran<sup>1</sup>

$^1\text{H}$  NMR (400 MHz,  $\text{CDCl}_3$ )  $\delta$  7.88 – 7.73 (m, 2H), 7.59 – 7.55 (m, 1H), 7.53 – 7.50 (m, 1H), 7.25 (dq,  $J = 14.5, 7.3, 1.3$  Hz, 2H), 7.01 – 6.96 (m, 2H), 6.89 (d,  $J = 0.8$  Hz, 1H), 3.87 (s, 3H).  $^{13}\text{C}$  NMR (101 MHz,  $\text{CDCl}_3$ )  $\delta$  160.17, 156.24, 154.89, 129.68, 126.60, 123.91, 123.54, 123.01, 120.75, 114.44, 111.16, 99.86, 55.53.

### d. 5,7-dimethyl-2-phenylbenzofuran<sup>3</sup>

$^1\text{H}$  NMR (400 MHz,  $\text{CDCl}_3$ )  $\delta$  8.00 – 7.87 (m, 2H), 7.51 (t,  $J = 7.5$  Hz, 2H), 7.40 (dd,  $J = 10.6, 4.1$  Hz, 1H), 7.25 (s, 1H), 6.99 (s, 2H), 2.63 (s, 3H), 2.49 (s, 3H).  $^{13}\text{C}$  NMR (101 MHz,  $\text{CDCl}_3$ )  $\delta$

155.74, 152.54, 132.46, 130.99, 128.95, 128.85, 128.41, 126.81, 124.94, 120.93, 118.32, 101.53, 21.44, 15.15.

**e.** 2-(4-(tert-butyl)phenyl)benzofuran<sup>4</sup>

<sup>1</sup>H NMR (400 MHz, CDCl<sub>3</sub>) δ 7.83 (t, *J* = 9.2 Hz, 2H), 7.59 (dd, *J* = 17.2, 7.7 Hz, 2H), 7.51 (d, *J* = 8.4 Hz, 2H), 7.35 – 7.23 (m, 2H), 7.01 (s, 1H), 1.40 (s, 9H). <sup>13</sup>C NMR (101 MHz, CDCl<sub>3</sub>) δ 156.33, 155.00, 151.95, 132.44, 129.54, 127.91, 125.90, 125.65, 124.92, 124.16, 123.01, 120.93, 111.30, 100.85, 34.93, 31.42.

**f.** 5,7-dimethyl-2-(p-tolyl)benzofuran

White solid. Mp: 81-84 °C <sup>1</sup>H NMR (400 MHz, CDCl<sub>3</sub>) δ 7.78 (d, *J* = 8.1 Hz, 2H), 7.27 (d, *J* = 7.6 Hz, 2H), 7.20 (s, 1H), 6.92 (s, 1H), 6.90 (s, 1H), 2.57 (s, 3H), 2.43 (s, 3H), 2.42 (s, 3H). <sup>13</sup>C NMR (101 MHz, CDCl<sub>3</sub>) δ 156.04, 152.40, 138.44, 132.40, 129.58, 129.07, 128.27, 126.55, 124.92, 120.89, 118.16, 100.78, 21.55, 21.47, 15.19. Mass m/z (GCMS): 236.1

**g.** 2-hexyl-5,7-dimethylbenzofuran

Brown liquid. <sup>1</sup>H NMR (500 MHz, CDCl<sub>3</sub>) δ 7.12 (s, 1H), 6.86 (s, 1H), 6.34 – 6.28 (m, 1H), 2.78 (td, *J* = 7.7, 2.2 Hz, 2H), 2.50 (3H), 2.42 (3H), 1.83 – 1.71 (m, 2H), 1.37 (dd, *J* = 6.9, 3.2 Hz, 6H), 0.94 (dd, *J* = 6.6, 3.4 Hz, 3H). <sup>13</sup>C NMR (126 MHz, CDCl<sub>3</sub>) δ 159.75, 152.21, 131.84, 128.78, 125.46, 120.46, 117.64, 101.81, 77.45, 77.20, 76.95, 31.78, 29.08, 28.71, 27.89, 22.77, 21.41, 15.19, 14.26. Mass m/z (GCMS): 230.1

**h.** 2-hexylbenzofuran<sup>5</sup>

<sup>1</sup>H NMR (500 MHz, CDCl<sub>3</sub>) δ 7.51 – 7.46 (m, 1H), 7.44 – 7.40 (m, 1H), 7.23 – 7.15 (m, 2H), 6.38 (d, *J* = 0.7 Hz, 1H), 2.80 – 2.71 (m, 2H), 1.75 (dt, *J* = 15.3, 7.5 Hz, 2H), 1.39 – 1.26 (m, 6H), 0.90 (td, *J* = 10.3, 5.5 Hz, 3H). <sup>13</sup>C NMR (126 MHz, CDCl<sub>3</sub>) δ 159.96, 154.79, 129.21, 123.17, 122.52, 120.32, 110.87, 101.91, 31.76, 29.06, 28.64, 27.84, 22.75, 14.25.

i. 2-(4-fluorophenyl)benzofuran<sup>1</sup>

<sup>1</sup>H NMR (400 MHz, CDCl<sub>3</sub>) δ 7.91 – 7.78 (m, 2H), 7.61 – 7.56 (m, 1H), 7.54 – 7.50 (m, 1H), 7.32 – 7.27 (m, 1H), 7.26 – 7.21 (m, 1H), 7.18 – 7.11 (m, 2H), 6.96 (s, 1H). <sup>13</sup>C NMR (101 MHz, CDCl<sub>3</sub>) δ 164.29, 161.82, 155.19, 155.02, 129.36, 126.97, 126.89, 124.47, 123.20, 121.07, 116.16, 115.94, 111.31, 101.17, 1.21.

k. 7-methoxy-2-phenylbenzofuran-5-carbaldehyde<sup>6</sup>

<sup>1</sup>H NMR (500 MHz, CDCl<sub>3</sub>) δ 10.00 (s, 1H), 7.90 (d, *J* = 8.1 Hz, 2H), 7.71 (s, 1H), 7.46 (t, *J* = 7.6 Hz, 2H), 7.42 – 7.35 (m, 2H), 7.12 – 7.07 (m, 1H), 4.10 (s, 3H). <sup>13</sup>C NMR (126 MHz, CDCl<sub>3</sub>) δ 191.93, 158.02, 147.87, 146.25, 133.66, 131.02, 129.74, 129.38, 129.05, 125.38, 119.47, 104.81, 102.05, 56.40.

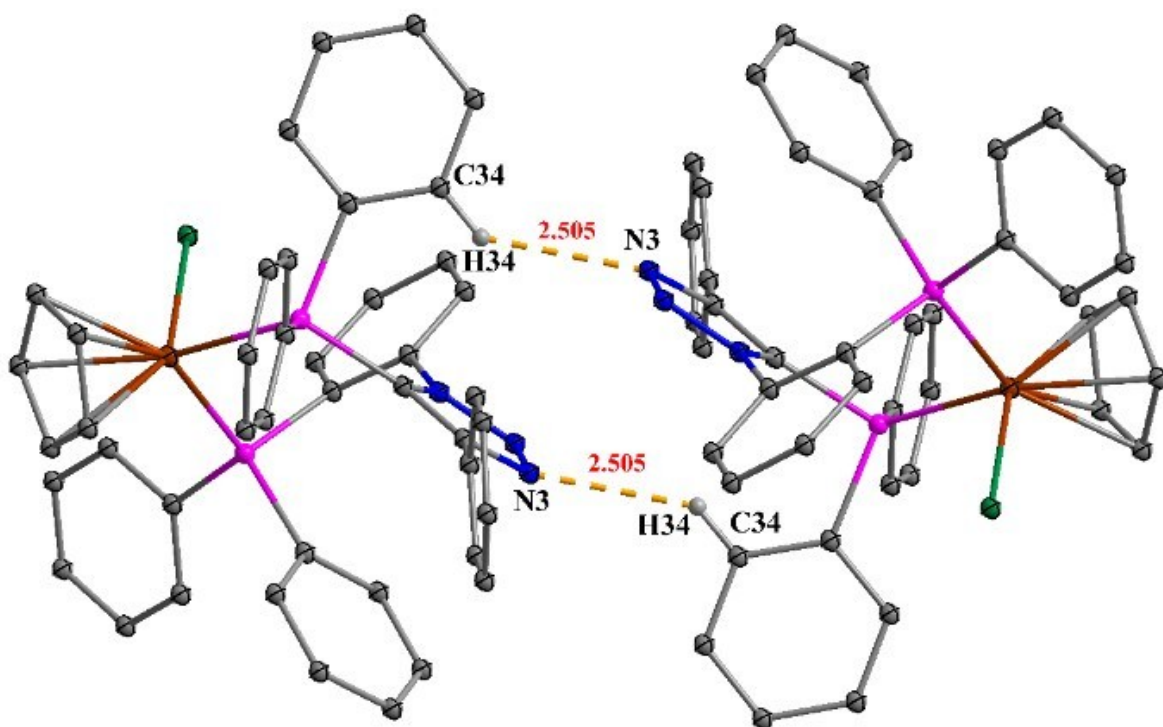

**Fig. S1** Molecular structure of **8** showing intermolecular hydrogen bonding.

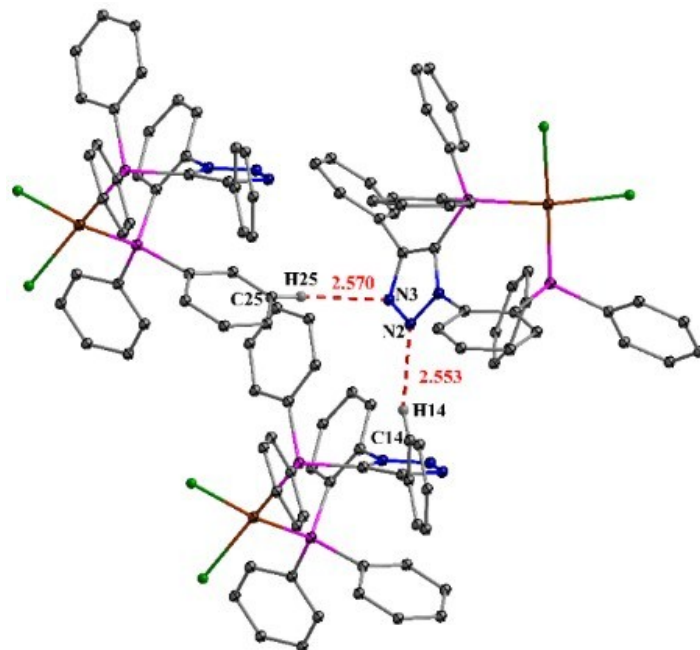

**Fig. S2** Molecular structure of **10** showing intermolecular hydrogen bonding

### (3). Computational Details

Density functional theory calculations were performed using the Gaussian 09 suite of quantum chemical programs. The optimized molecular structures and determination of energies were calculated by using M06/6-31G\*\*, lan12dz (Mo, W) level of theory. Molecular orbital analysis have been done to find the HOMO-LUMO energy gap using the iop(6/7=3) at M062X/6-31G\*\* level of theory. Graphical representations of the optimized geometries of compounds **3-6** were created by using CYLView.<sup>7</sup>

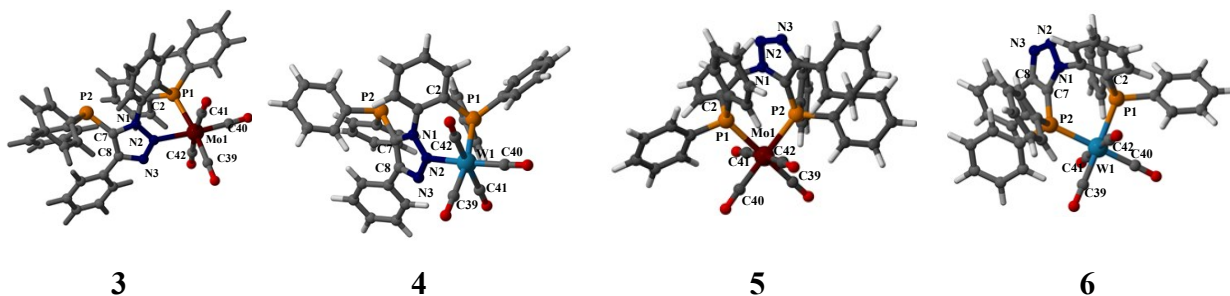

**Fig. S3** Optimized structures of **3-6** at M062X/6-31G\*\*, lanl2dz level of theory

**Table S1** Selected experimental and DFT calculated bond lengths (Å) of compounds **4-6**

|       | <b>4 (M=W)</b> | <b>DFT 4</b> | <b>5 (M=Mo)</b> | <b>DFT 5</b> | <b>6 (M=W)</b> | <b>DFT 6</b> |
|-------|----------------|--------------|-----------------|--------------|----------------|--------------|
| P1-C2 | 1.840(4)       | 1.846        | 1.846(3)        | 1.855        | 1.844(5)       | 1.856        |
| P2-C7 | 1.824(4)       | 1.837        | 1.834(3)        | 1.834        | 1.828(5)       | 1.836        |
| P1-M  | 2.5156(11)     | 2.538        | 2.5335(9)       | 2.59         | 2.5263(13)     | 2.571        |
| P2-M  | -              | -            | 2.5245(9)       | 2.561        | 2.5131(13)     | 2.547        |
| M-C39 | 1.972(5)       | 2.004        | 1.997(4)        | 2.001        | 2.000(6)       | 1.995        |
| M-C40 | 1.978(5)       | 1.978        | 1.998(4)        | 2.012        | 2.006(6)       | 2.004        |
| M-C41 | 2.039(5)       | 2.042        | 2.030(4)        | 2.06         | 2.027(5)       | 2.004        |
| M-C42 | 2.021(5)       | 2.047        | 2.044(4)        | 2.05         | 2.039(5)       | 2.038        |
| N2-N3 | 1.313(5)       | 1.297        | 1.303(4)        | 1.288        | 1.311(6)       | 1.289        |
| M-N2  | 2.242(3)       | 2.286        | -               | -            | -              | -            |

**Table S2** Selected experimental and DFT calculated bond angles (deg) of compounds **4-6**

|           | <b>4 (M=W)</b> | <b>DFT 4</b> | <b>5 (M=Mo)</b> | <b>DFT 5</b> | <b>6 (M=W)</b> | <b>DFT 6</b> |
|-----------|----------------|--------------|-----------------|--------------|----------------|--------------|
| P1-M-P2   | -              | -            | 87.76(3)        | 87.112       | 87.81(4)       | 86.841       |
| P1-M-N2   | 75.10(9)       | 75.701       | -               | -            | -              | -            |
| P1-M-C40  | 97.74(15)      | 97.912       | 92.21(10)       | 92.730       | 92.27(16)      | 92.961       |
| P2-M-C39  | -              | -            | 92.06(10)       | 91.117       | 92.27(16)      | 91.131       |
| N2-M-C39  | 96.93(18)      | 94.905       | -               | -            | -              | -            |
| P1-M-C39  | 171.68(15)     | 169.201      | 174.34(11)      | 173.117      | 173.87(15)     | 173.082      |
| N2-M-C40  | 172.32(16)     | 171.858      | -               | -            | -              | -            |
| P2-M-C40  | -              | -            | 178.17(10)      | 177.696      | 178.09(14)     | 176.744      |
| C41-M-C42 | 173.32(17)     | 174.802      | 174.19(14)      | 176.701      | 174.8(2)       | 177.709      |
| N1-N2-N3  | 107.3(3)       | 108.218      | 107.4(3)        | 107.663      | 107.2(4)       | 107.652      |

#### (4) NMR and mass spectra of 2 and 4-12

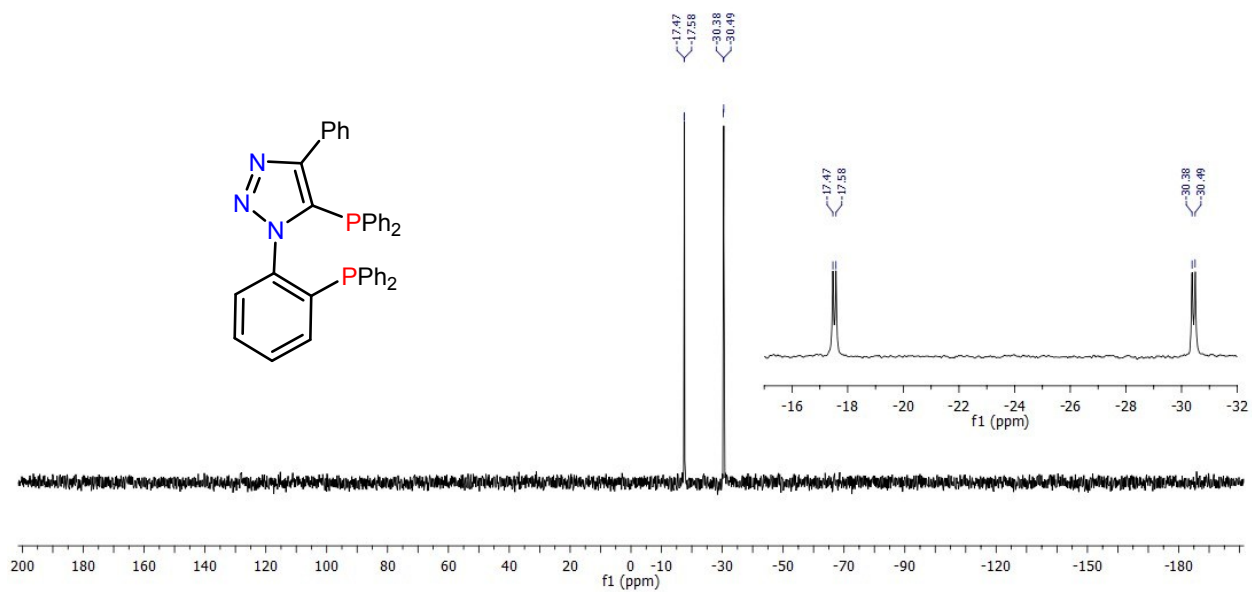

Fig. S4  $^{31}\text{P}\{^1\text{H}\}$  NMR spectrum of **2** in  $\text{CDCl}_3$  (202 MHz)

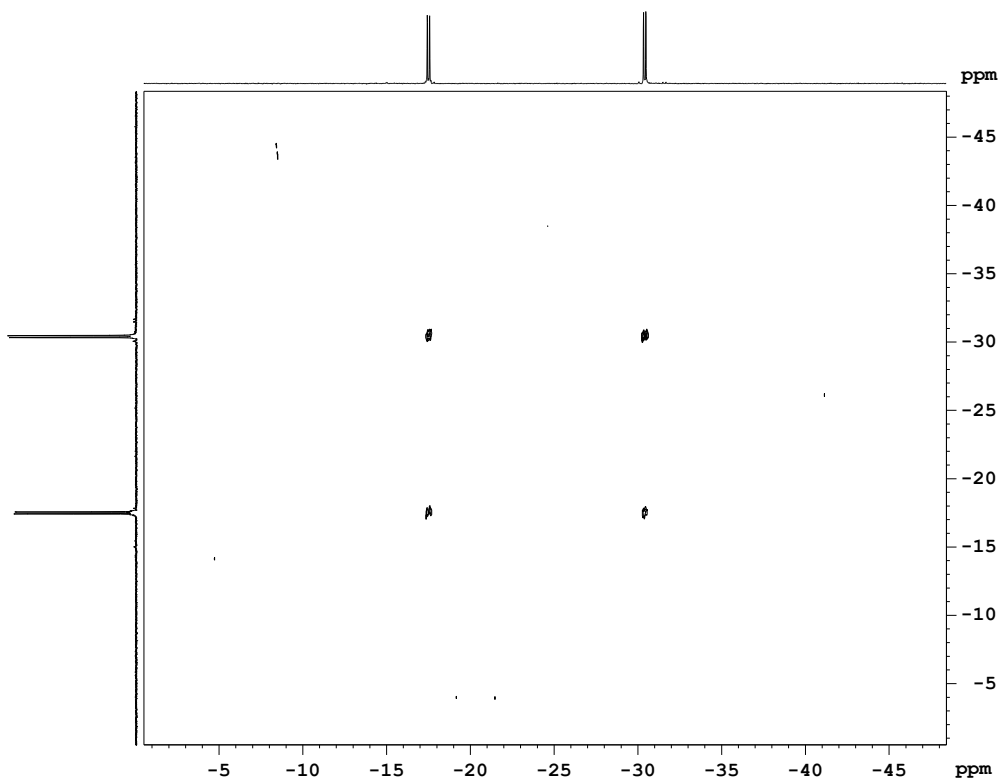

Fig. S5  $^{31}\text{P}\{^1\text{H}\}$ - $^{31}\text{P}\{^1\text{H}\}$  COSY NMR spectrum of **2** in  $\text{CDCl}_3$  (162 MHz)



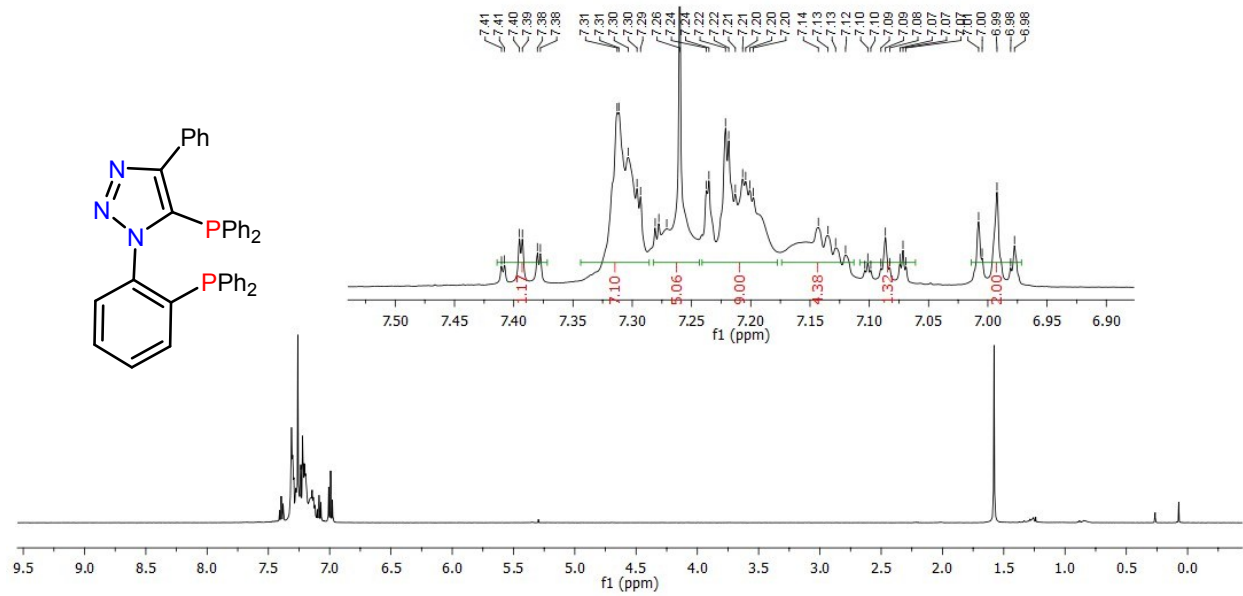

**Fig. S6**  $^1\text{H NMR}$  spectrum of **2** in  $\text{CDCl}_3$  (500 MHz)

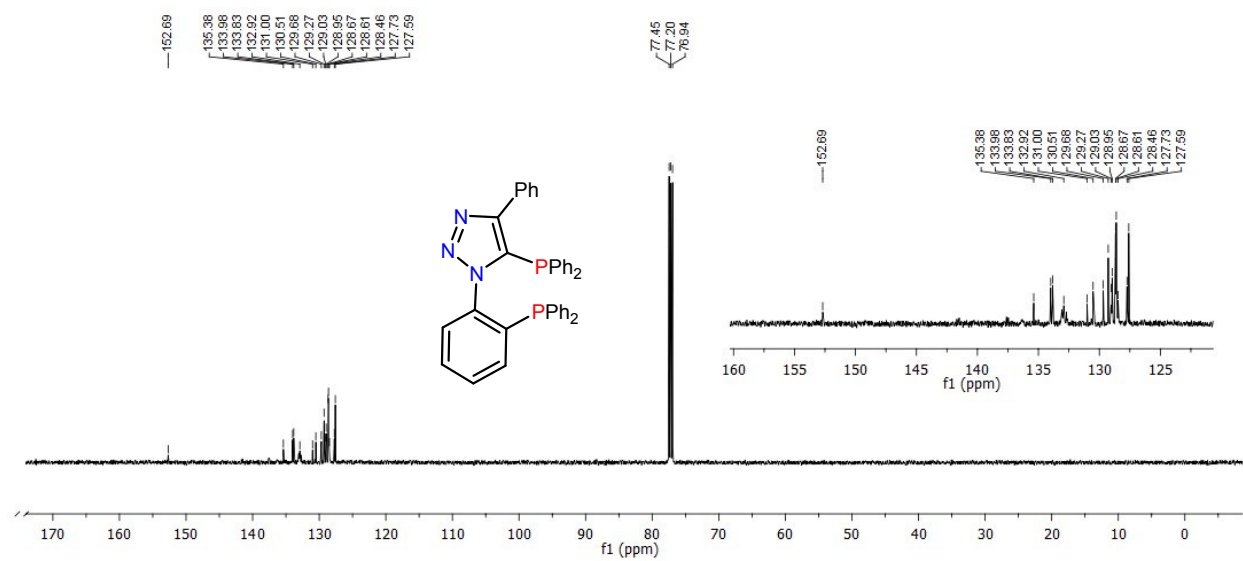

**Fig. S7**  $^{13}\text{C NMR}$  spectrum of **2** in  $\text{CDCl}_3$  (126 MHz)

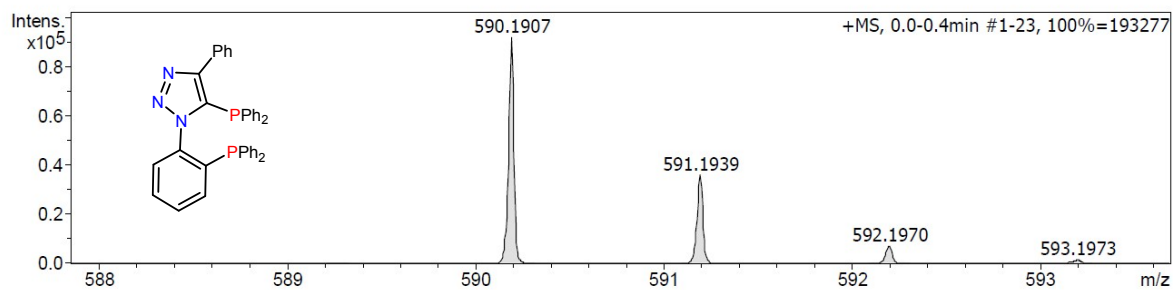

| Meas. m/z | # | Ion Formula                                                   | m/z      | err [ppm] | mSigma | # Sigma | Score  | rdb  | e <sup>-</sup> Conf | N-Rule |
|-----------|---|---------------------------------------------------------------|----------|-----------|--------|---------|--------|------|---------------------|--------|
| 590.1907  | 1 | C <sub>38</sub> H <sub>30</sub> N <sub>3</sub> P <sub>2</sub> | 590.1909 | 0.5       | 17.0   | 1       | 100.00 | 26.5 | even                | ok     |

**Fig. S8** EI mass spectrum of **2**

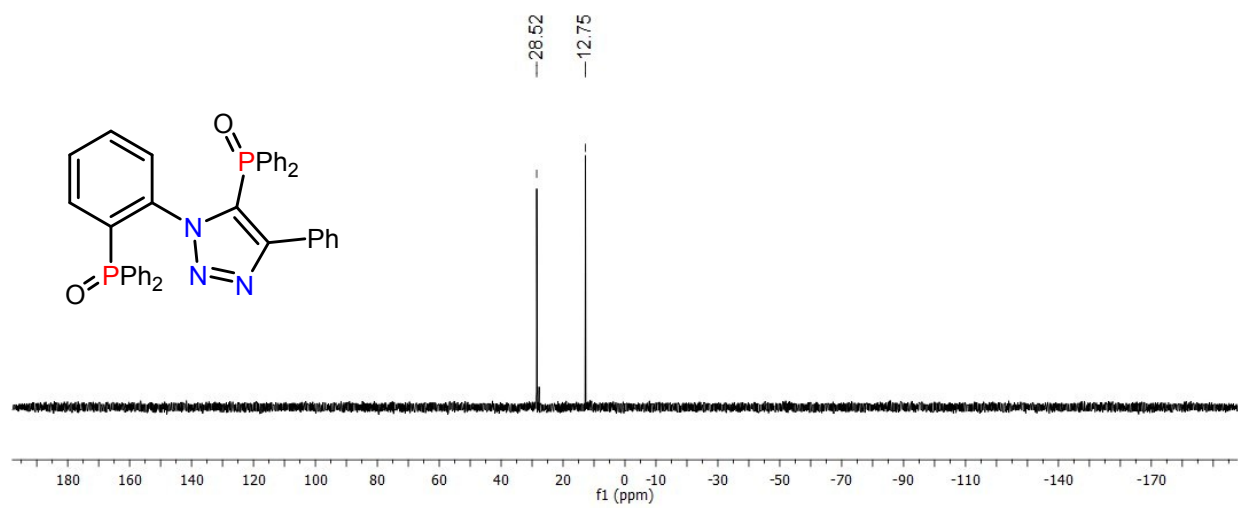

**Fig. S9**  $^{31}\text{P}\{^1\text{H}\}$  NMR spectrum of **2a** in  $\text{CDCl}_3$  (162 MHz)

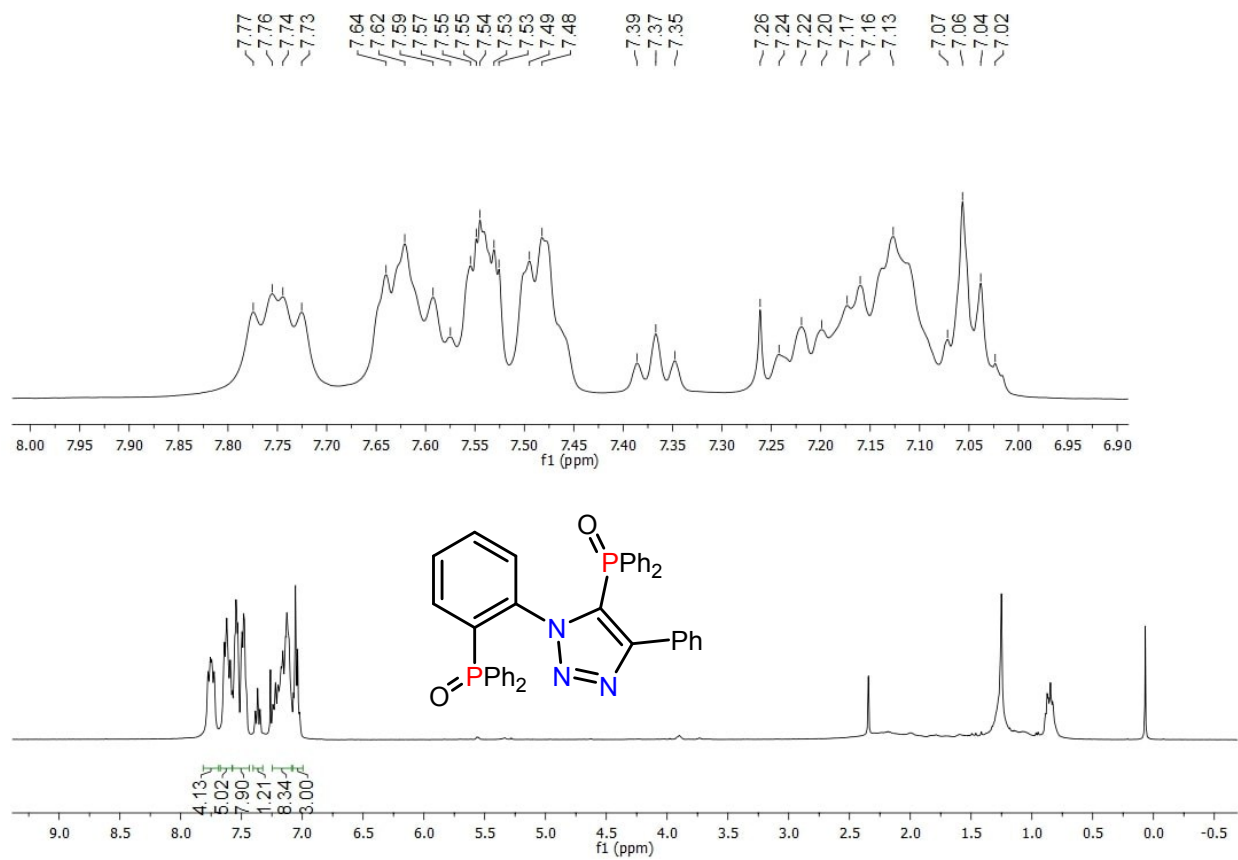

**Fig. S10** <sup>1</sup>H NMR spectrum of **2a** in CDCl<sub>3</sub> (400 MHz)

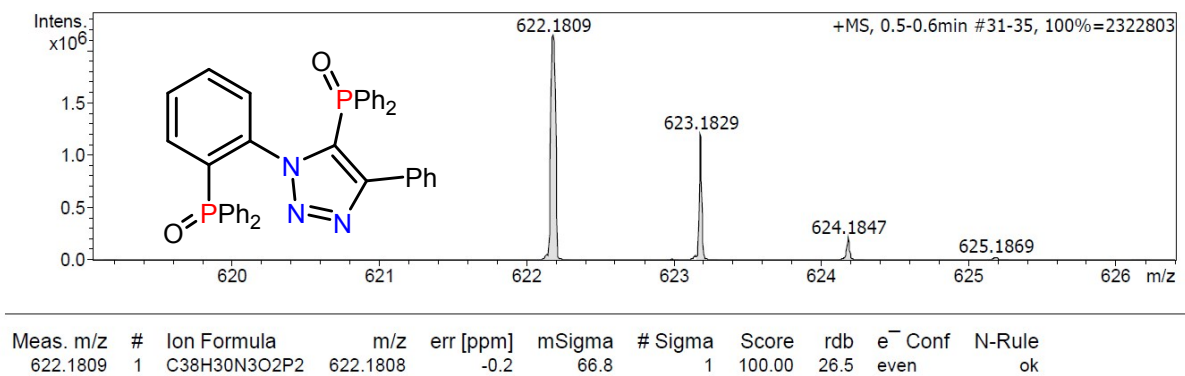

**Fig. S11** EI mass spectrum of **2a**

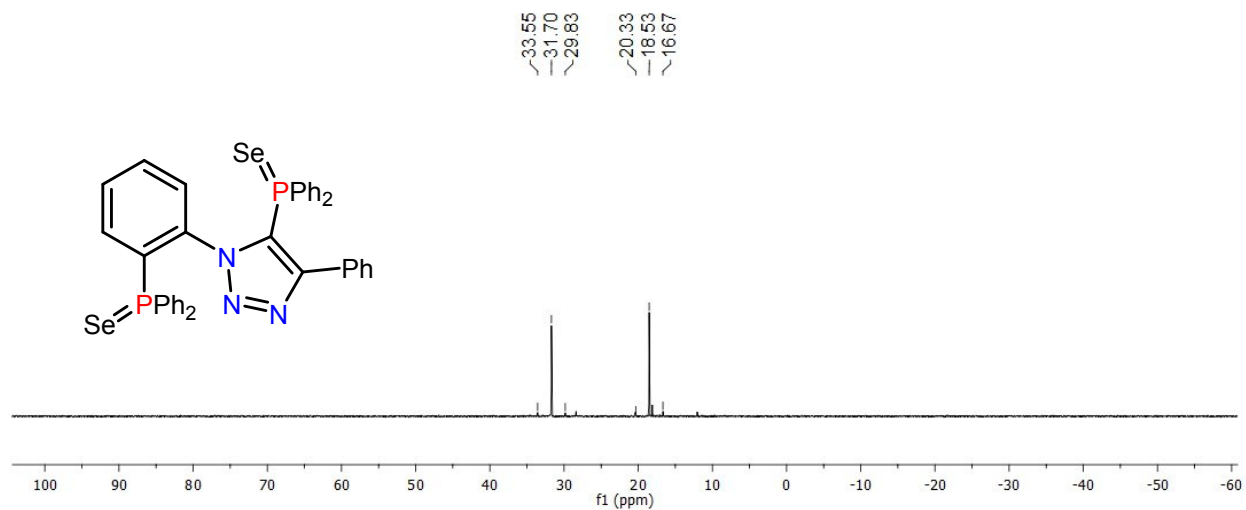

**Fig. S12**  $^{31}\text{P}\{^1\text{H}\}$  NMR spectrum of **2b** in  $\text{CDCl}_3$  (162 MHz)

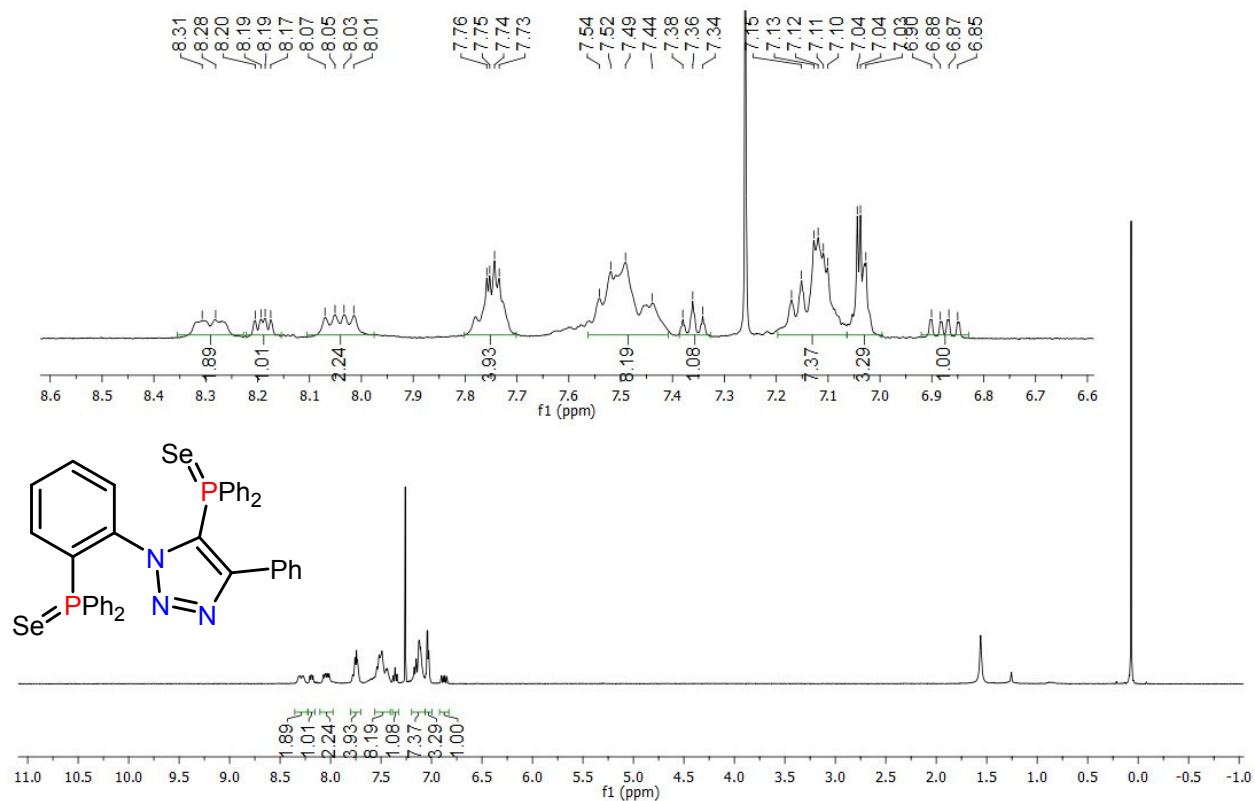

**Fig. S13**  $^1\text{H}$  NMR spectrum of **2b** in  $\text{CDCl}_3$  (400 MHz)

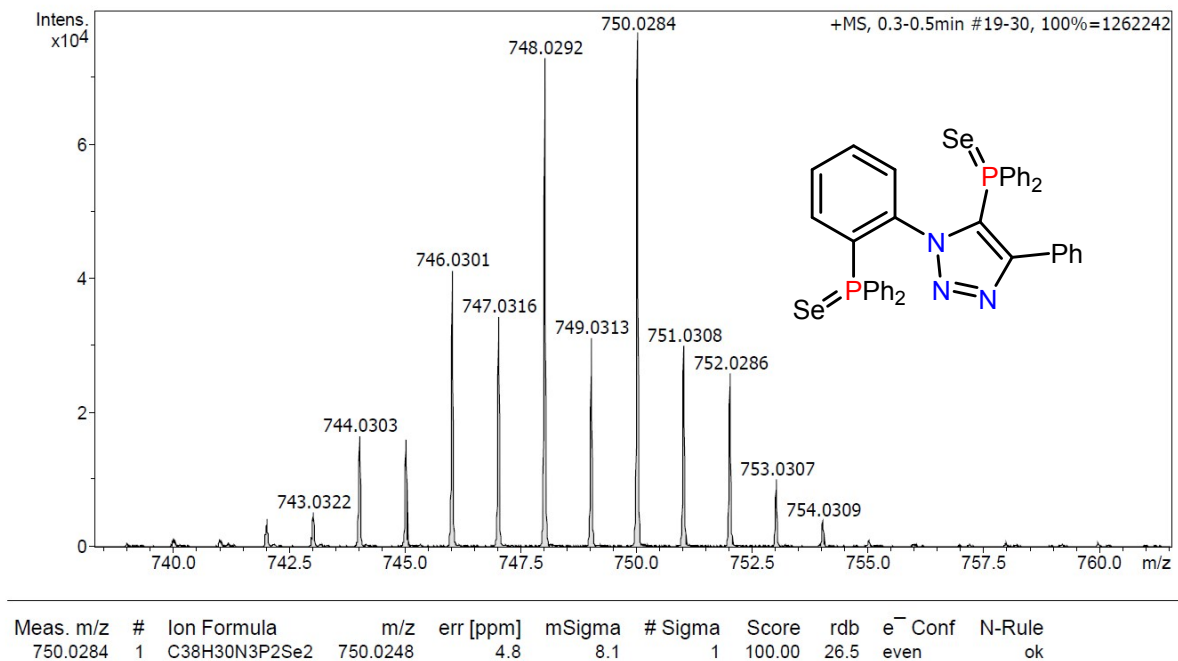

**Fig. S14** EI mass spectrum of **2b**

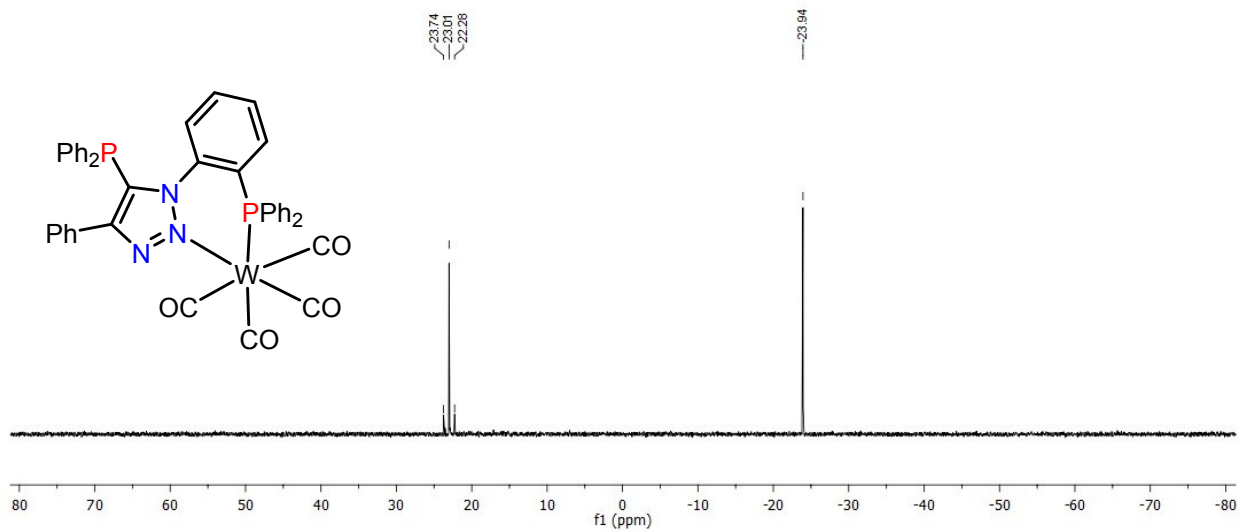

**Fig. S15**  $^{31}\text{P}\{^1\text{H}\}$  NMR spectrum of **4** in  $\text{CDCl}_3$  (162 MHz)

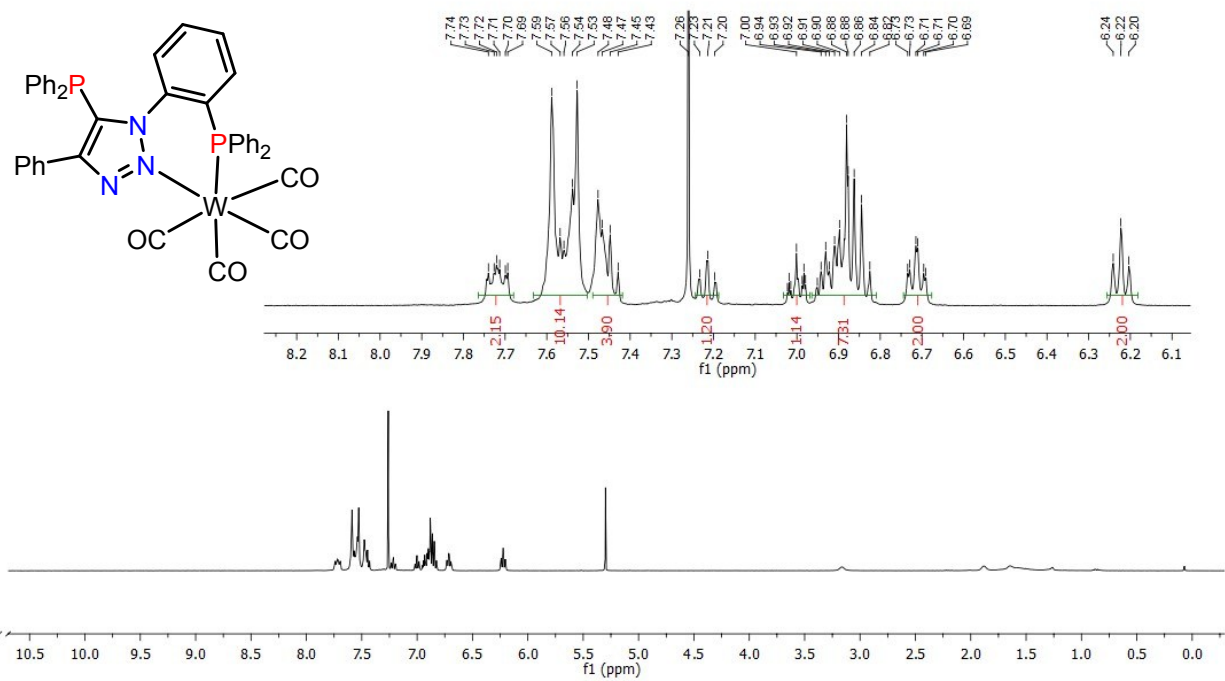

**Fig. S16.** <sup>1</sup>H NMR spectrum of **4** in CDCl<sub>3</sub> (400 MHz)

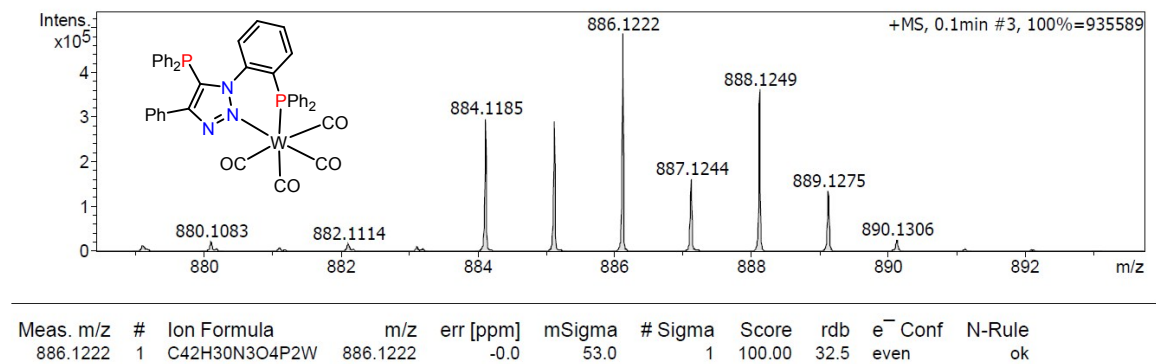

**Fig. S17** EI mass spectrum of **4**

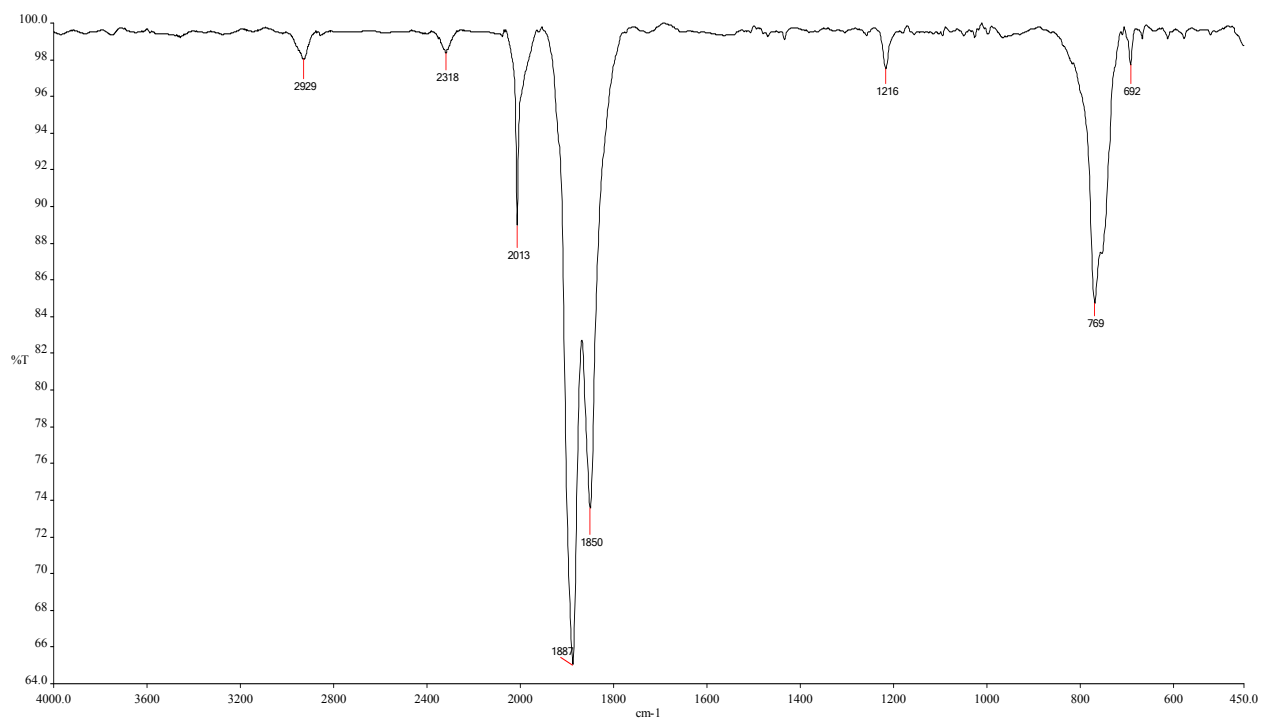

**Fig. S18** IR spectrum of **4**

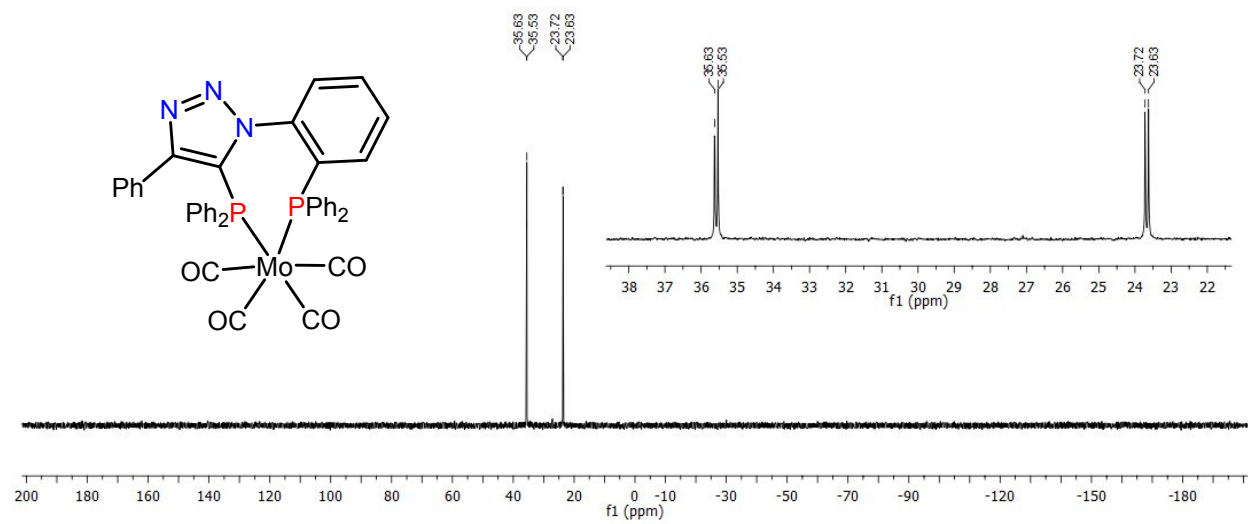

**Fig. S19** <sup>31</sup>P{<sup>1</sup>H} NMR spectrum of **5** in CDCl<sub>3</sub> (202 MHz)

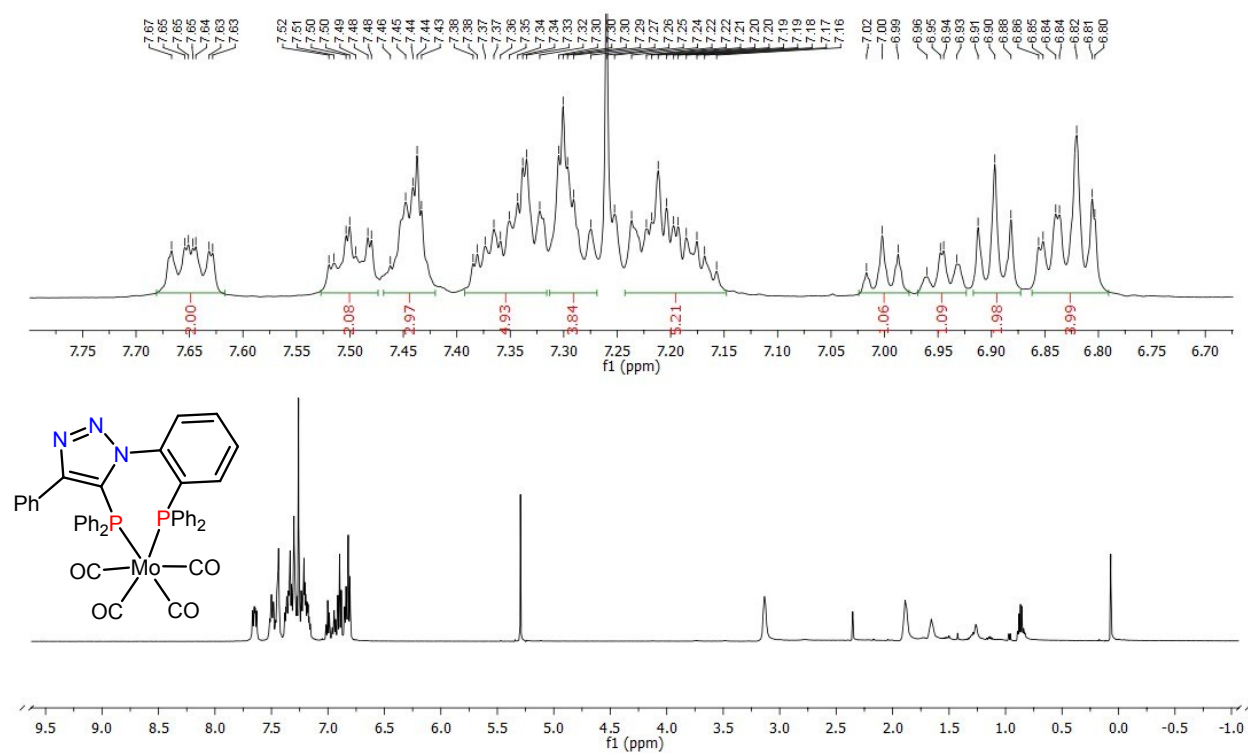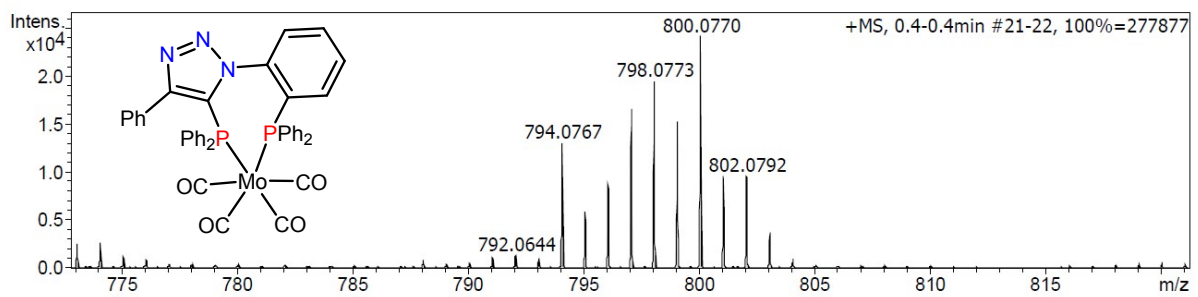

| Meas. m/z | # | Ion Formula    | m/z      | err [ppm] | mSigma | # Sigma | Score  | rdb  | e <sup>-</sup> Conf | N-Rule |
|-----------|---|----------------|----------|-----------|--------|---------|--------|------|---------------------|--------|
| 800.0770  | 1 | C42H30MoN3O4P2 | 800.0770 | -1.3      | 20.7   | 1       | 100.00 | 32.5 | even                | ok     |



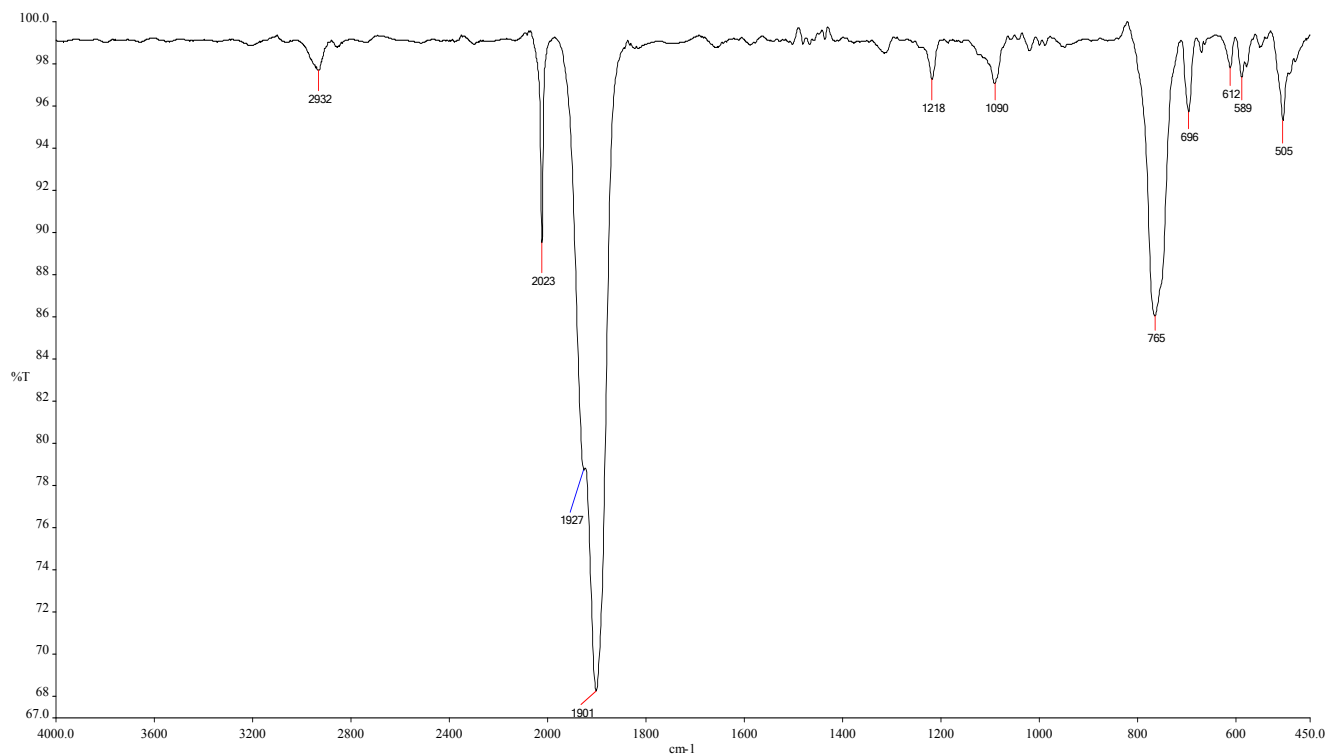

**Fig. S22** IR spectrum of **5**

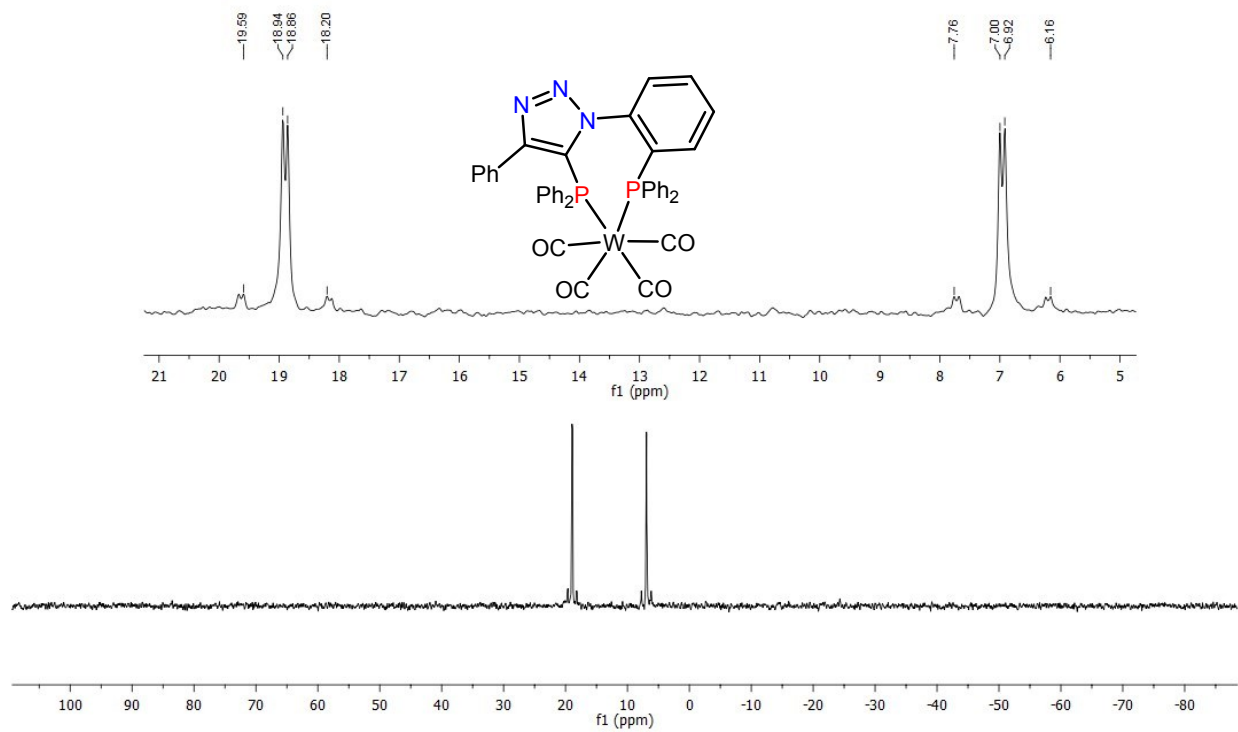

**Fig. S23** <sup>31</sup>P{<sup>1</sup>H} NMR spectrum of **6** in CDCl<sub>3</sub> (162 MHz)

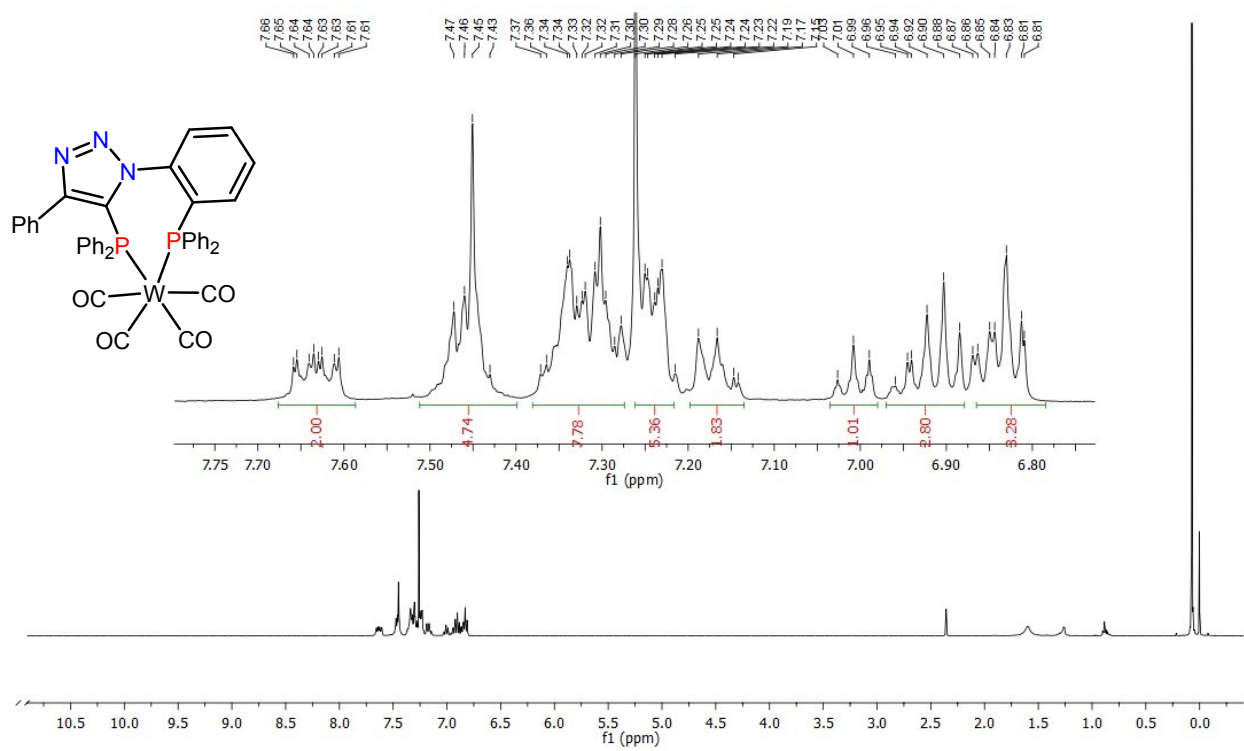

**Fig. S24**  $^1\text{H}$  NMR spectrum of **6** in  $\text{CDCl}_3$  (400 MHz)

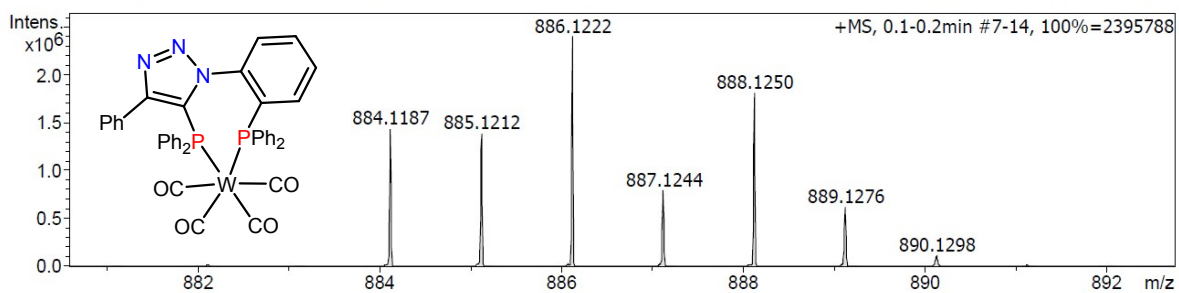

| Meas. m/z | # | Ion Formula                                                                    | m/z      | err [ppm] | mSigma | # Sigma | Score  | rdb  | e <sup>-</sup> | Conf | N-Rule |
|-----------|---|--------------------------------------------------------------------------------|----------|-----------|--------|---------|--------|------|----------------|------|--------|
| 886.1222  | 1 | C <sub>42</sub> H <sub>30</sub> N <sub>3</sub> O <sub>4</sub> P <sub>2</sub> W | 886.1222 | 0.0       | 60.0   | 1       | 100.00 | 32.5 | even           |      | ok     |

**Fig. S25** EI mass spectrum of **6**

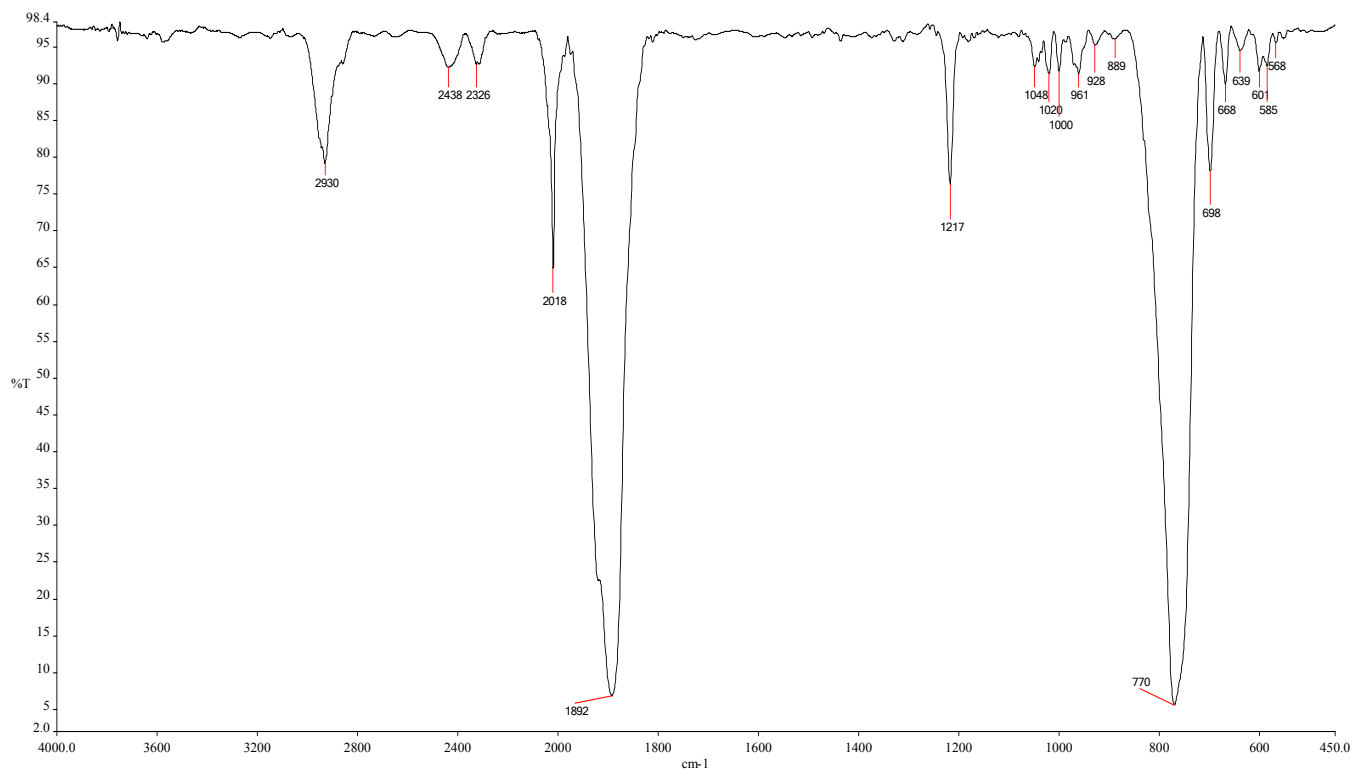

**Fig. S26** IR spectrum of **6**

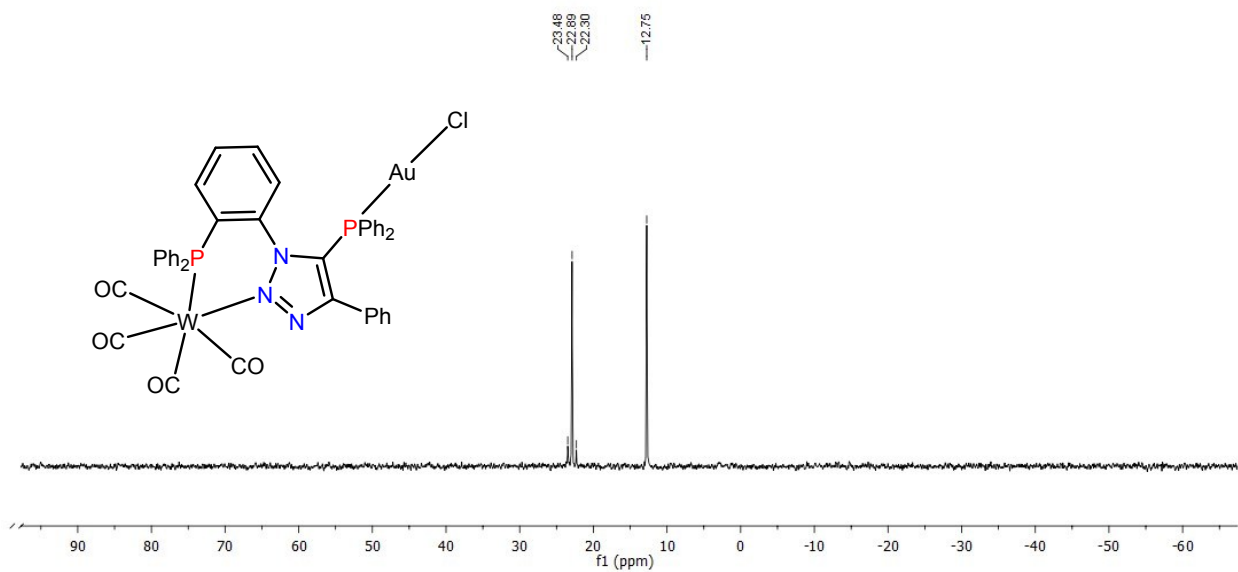

**Fig. S27** <sup>31</sup>P{<sup>1</sup>H} NMR spectrum of **7** in CDCl<sub>3</sub> (2022 MHz)

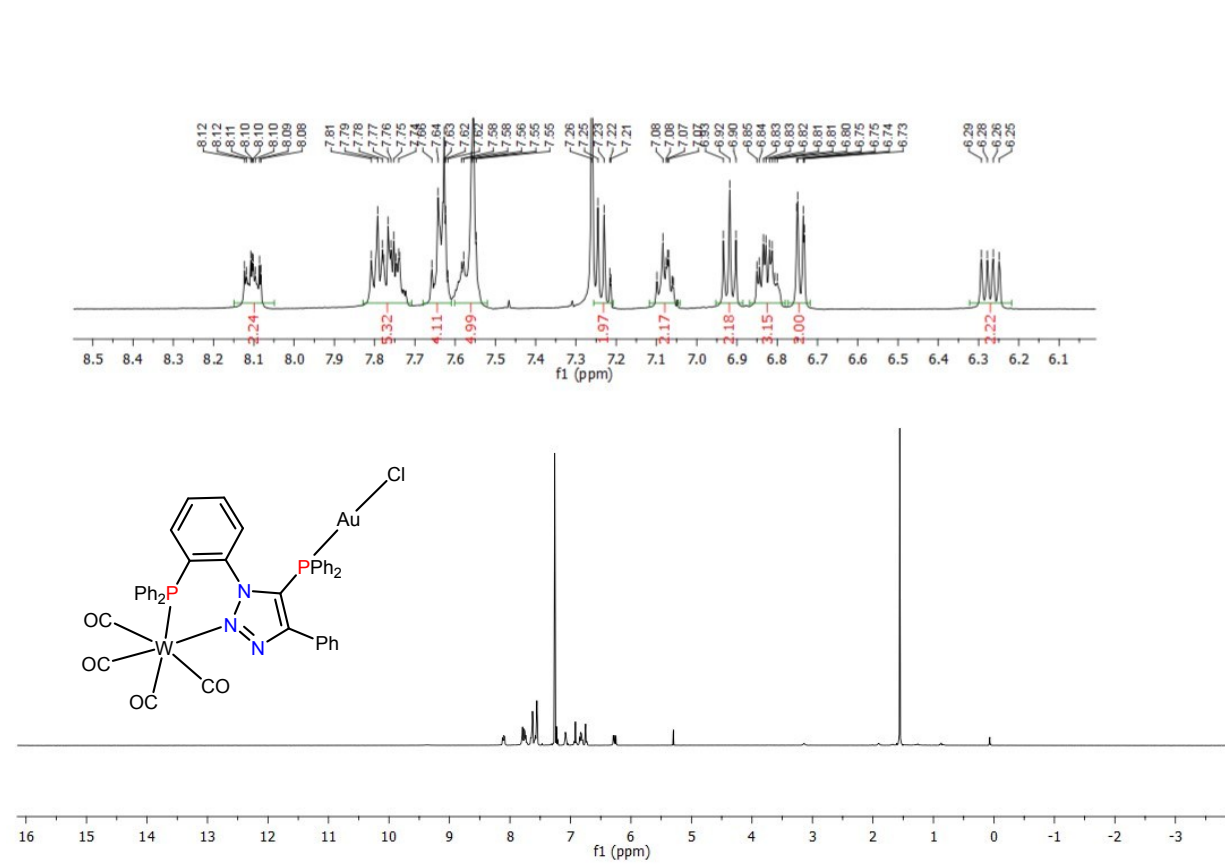

**Fig. S28** <sup>1</sup>H NMR spectrum of 7 in CDCl<sub>3</sub> (500 MHz)

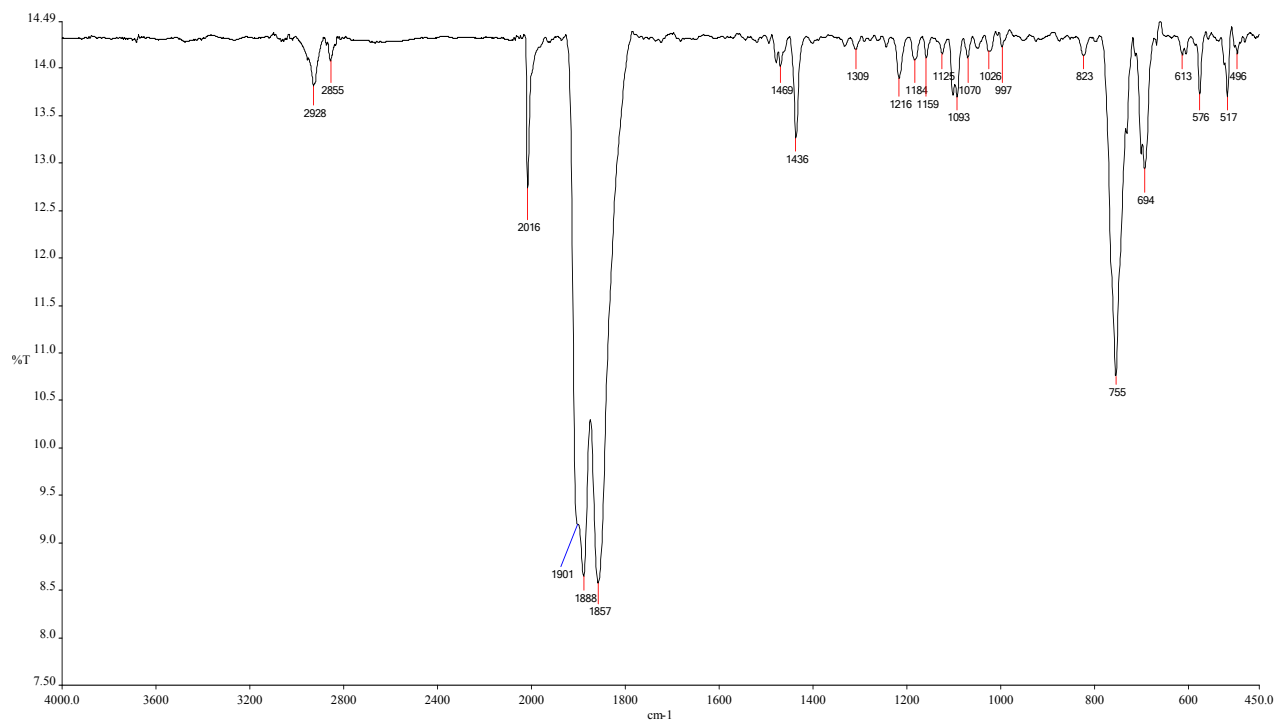

**Fig. S29** IR spectrum of 7

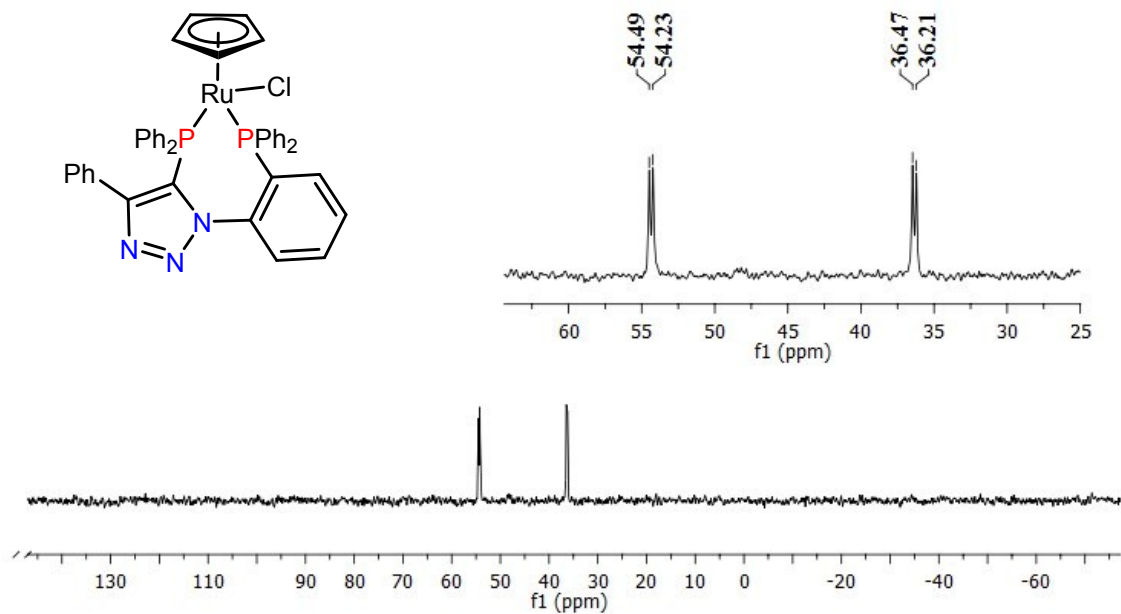

Fig. S30  $^{31}\text{P}\{^1\text{H}\}$  NMR spectrum of **8** in  $\text{CDCl}_3$  (202 MHz)

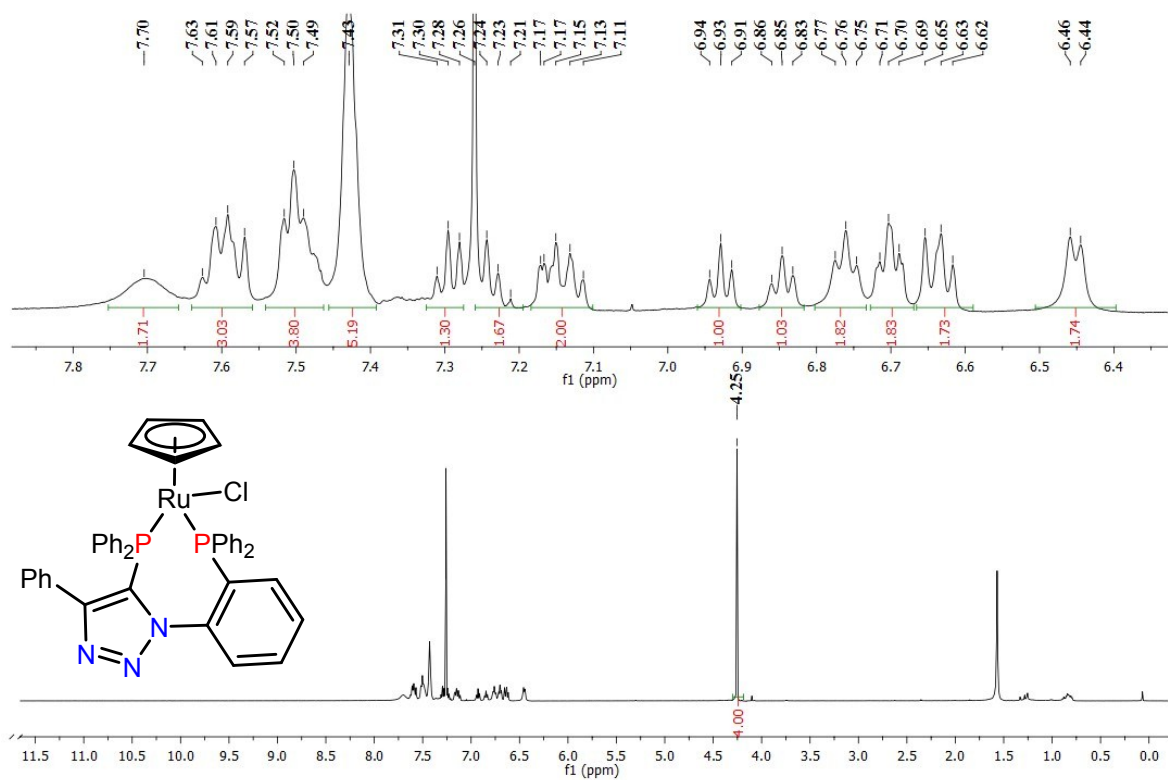

Fig. S31  $^1\text{H}$  NMR spectrum of **8** in  $\text{CDCl}_3$  (500 MHz)

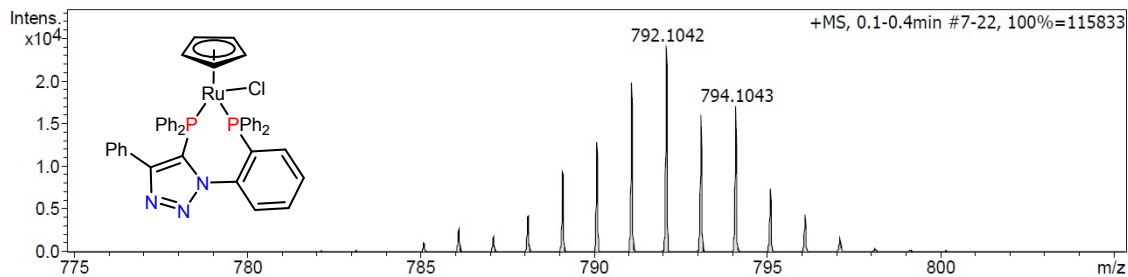

| Meas. m/z | # | Ion Formula    | m/z      | err [ppm] | mSigma | # Sigma | Score  | rdb  | e <sup>-</sup> Conf | N-Rule |
|-----------|---|----------------|----------|-----------|--------|---------|--------|------|---------------------|--------|
| 792.1042  | 1 | C43H35ClN3P2Ru | 792.1041 | 0.1       | 84.7   | 1       | 100.00 | 29.0 | odd                 | -      |

**Fig. S32** EI mass spectrum of **8**

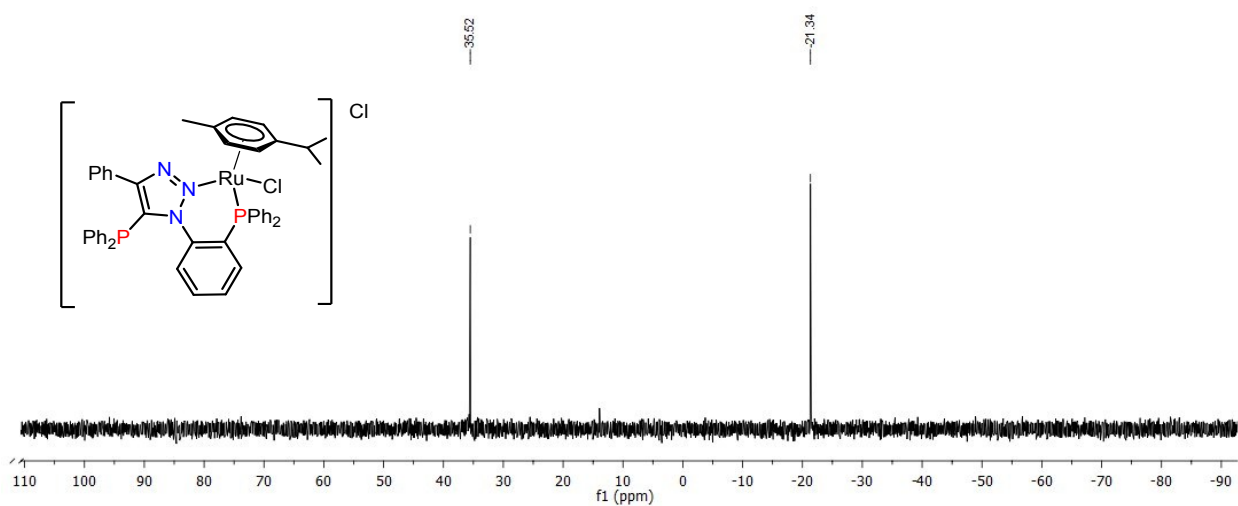

**Fig. S33**  $^{31}\text{P}\{^1\text{H}\}$  NMR spectrum of **9** in  $\text{CDCl}_3$  (202 MHz)

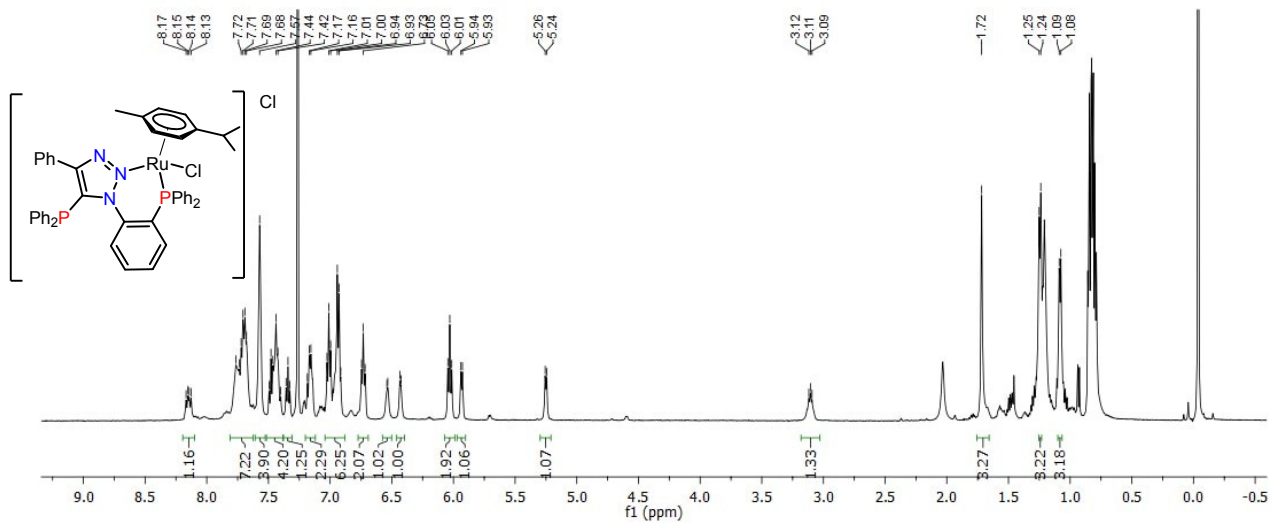

**Fig. S34**  $^1\text{H}$  NMR spectrum of **9** in  $\text{CDCl}_3$  (500 MHz)

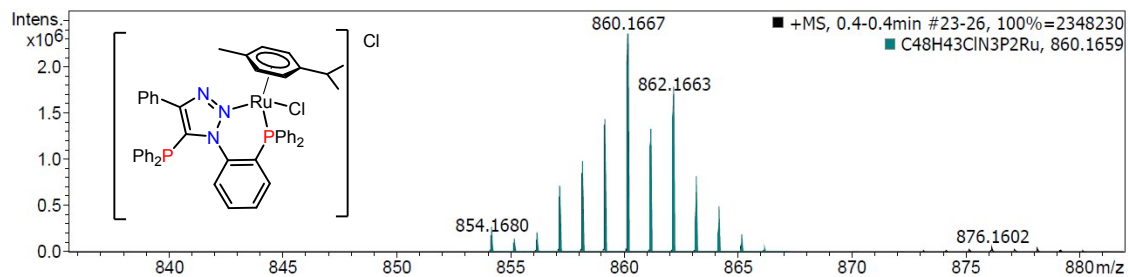

| Meas. m/z | # | Ion Formula    | m/z      | err [ppm] | mSigma | # Sigma | Score  | rdb  | e <sup>-</sup> Conf | N-Rule |
|-----------|---|----------------|----------|-----------|--------|---------|--------|------|---------------------|--------|
| 860.1667  | 1 | C48H43ClN3P2Ru | 860.1669 | -0.2      | 46.9   | 1       | 100.00 | 30.0 | odd                 | -      |

**Fig. S35** EI mass spectrum of **9**

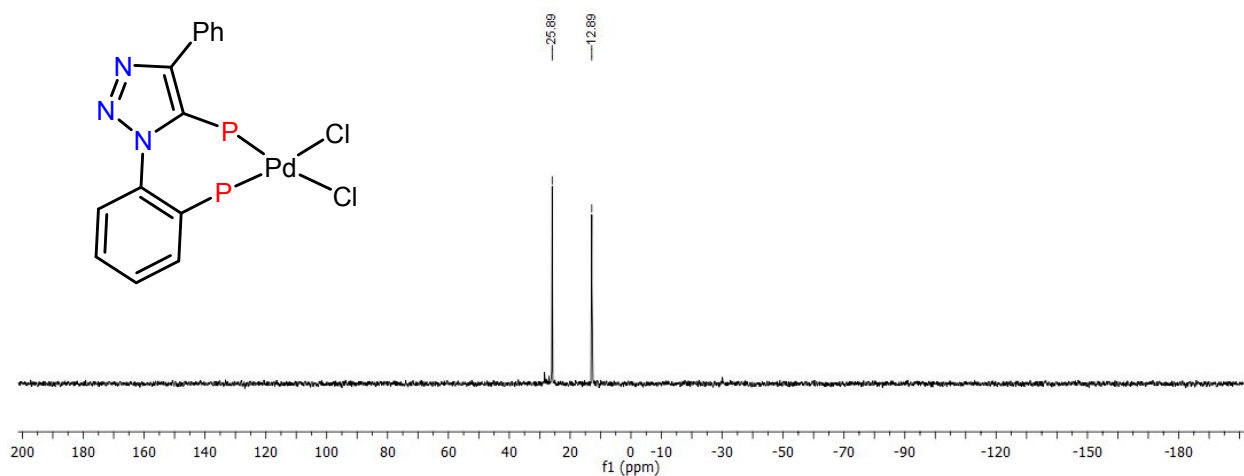

**Fig. S36** <sup>31</sup>P{<sup>1</sup>H} NMR spectrum of **10** in CDCl<sub>3</sub> (202 MHz)

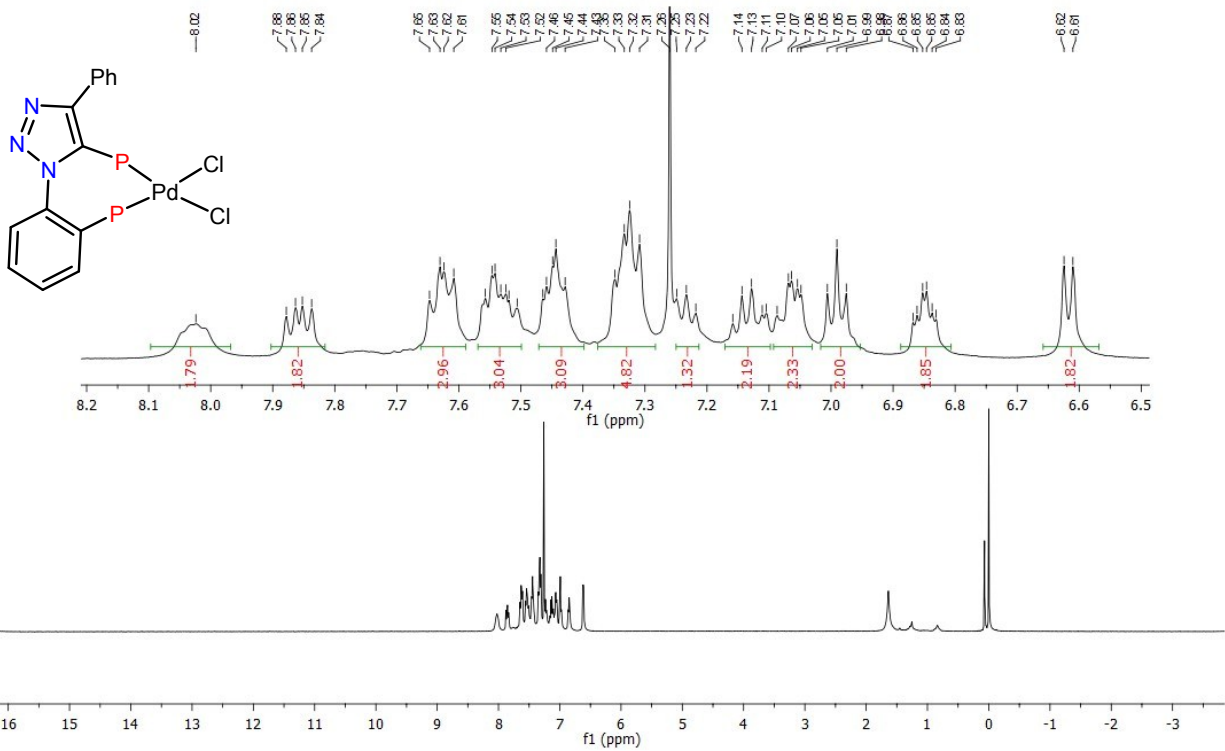

**Fig. S37** <sup>1</sup>H NMR spectrum of **10** in CDCl<sub>3</sub> (500 MHz)

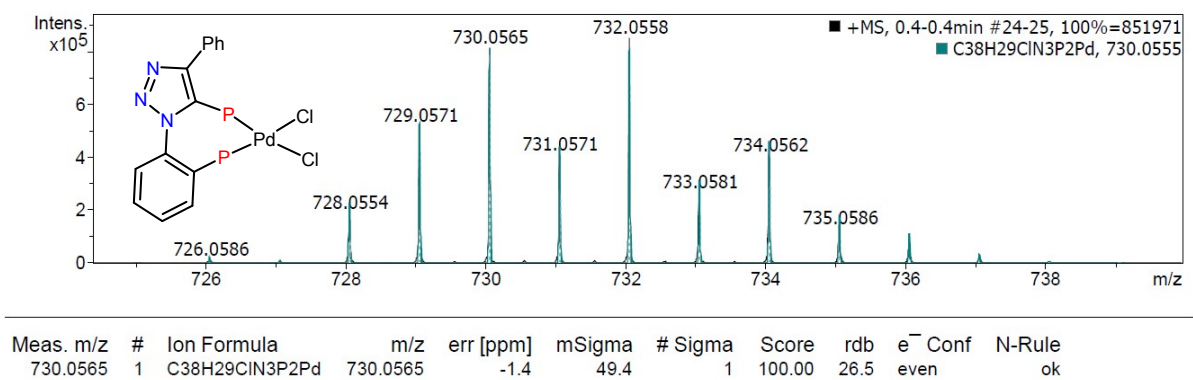

**Fig. S38** EI mass spectrum of **10**



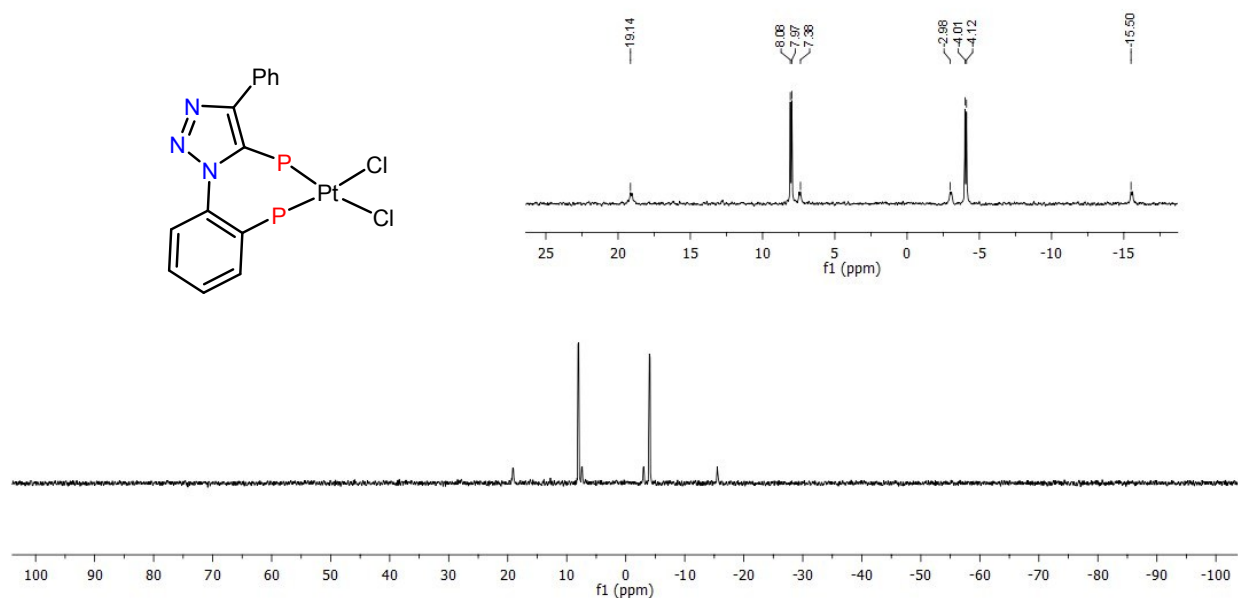

**Fig. S39**  $^{31}\text{P}\{^1\text{H}\}$  NMR spectrum of **11** in  $\text{CDCl}_3$  (202 MHz)

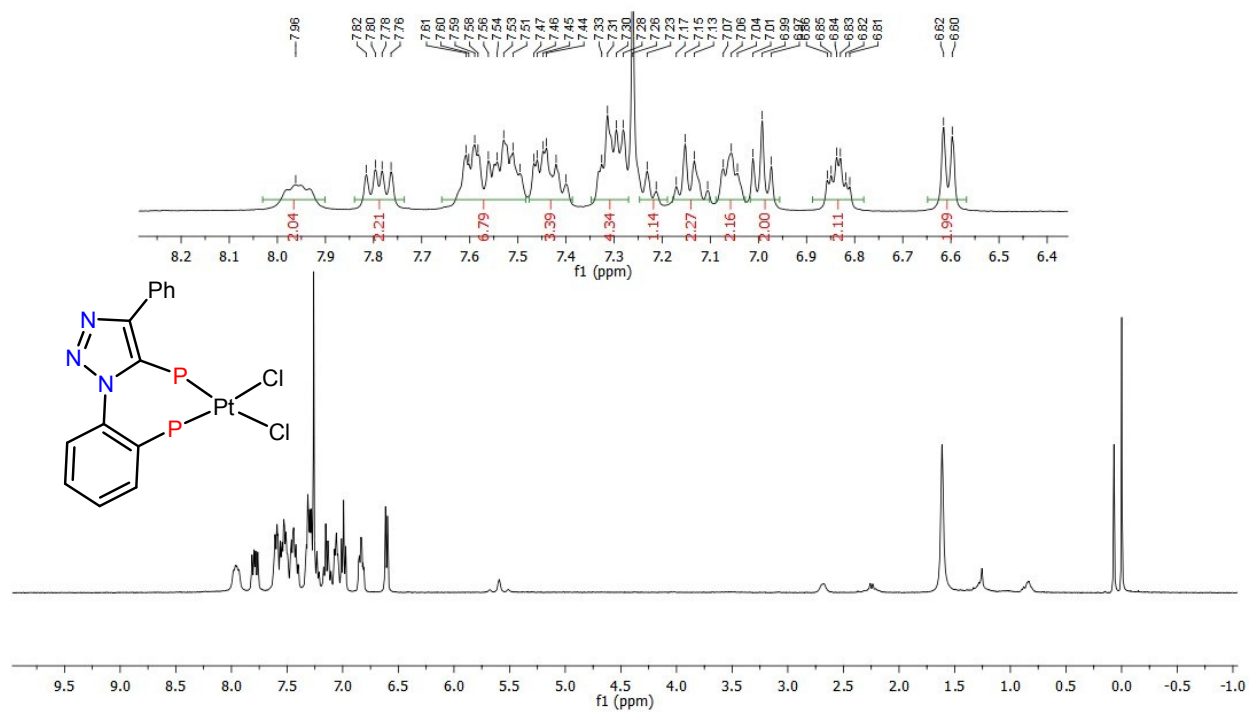

**Fig. S40**  $^1\text{H}$  NMR spectrum of **11** in  $\text{CDCl}_3$  (400 MHz)

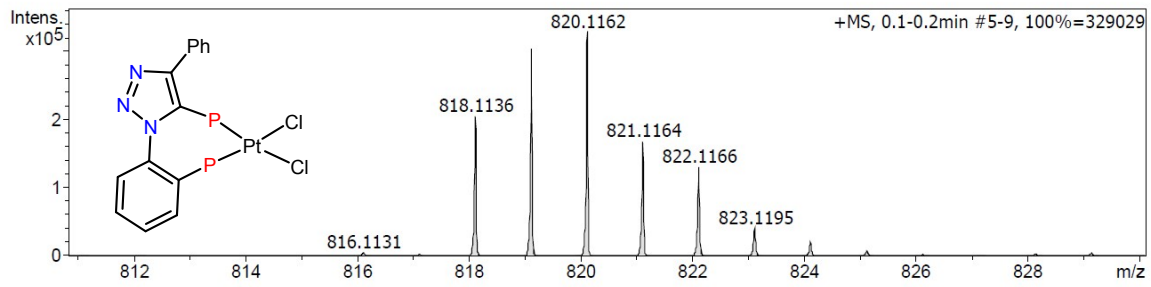

| Meas. m/z | # | Ion Formula    | m/z      | err [ppm] | mSigma | # Sigma | Score  | rdb  | e <sup>-</sup> Conf | N-Rule |
|-----------|---|----------------|----------|-----------|--------|---------|--------|------|---------------------|--------|
| 820.1162  | 1 | C38H29ClN3P2Pt | 819.1171 | -0.9      | 22.4   | 1       | 100.00 | 26.5 | even                | -      |

**Fig. S41** EI mass spectrum of **11**

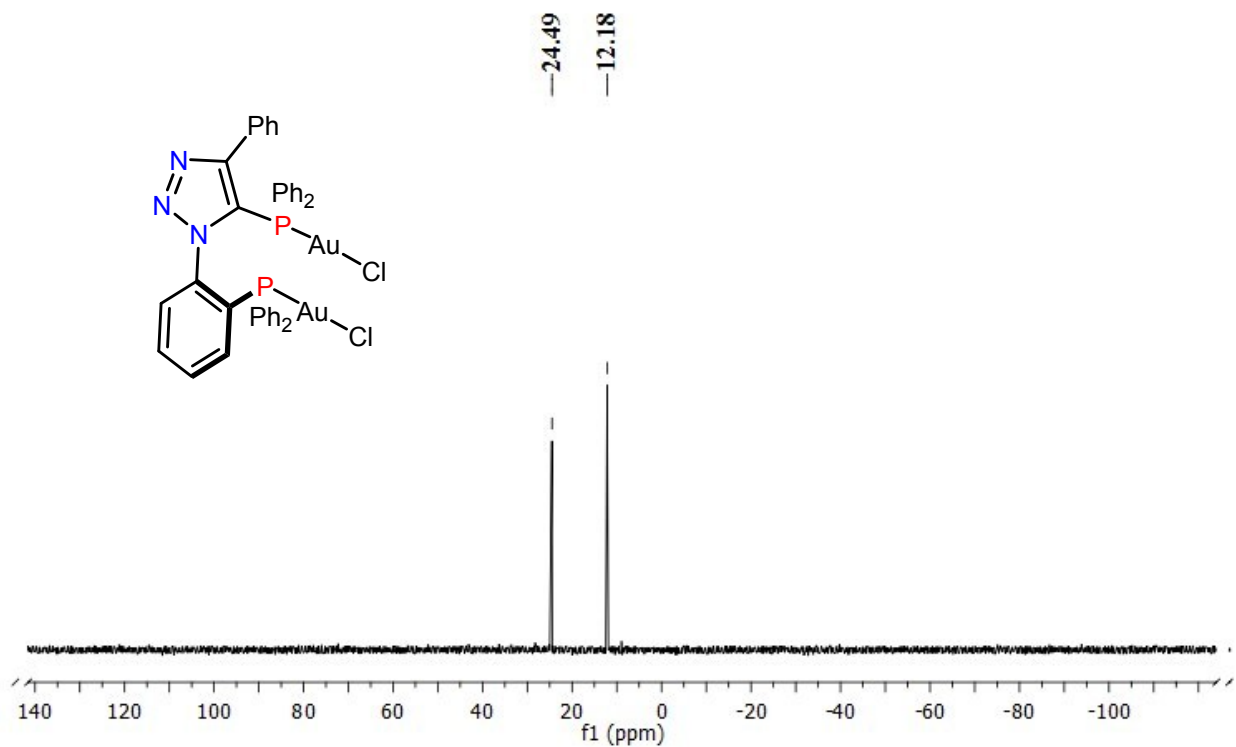

**Fig. S42** <sup>31</sup>P{<sup>1</sup>H} NMR spectrum of **12** in CDCl<sub>3</sub> (202 MHz)

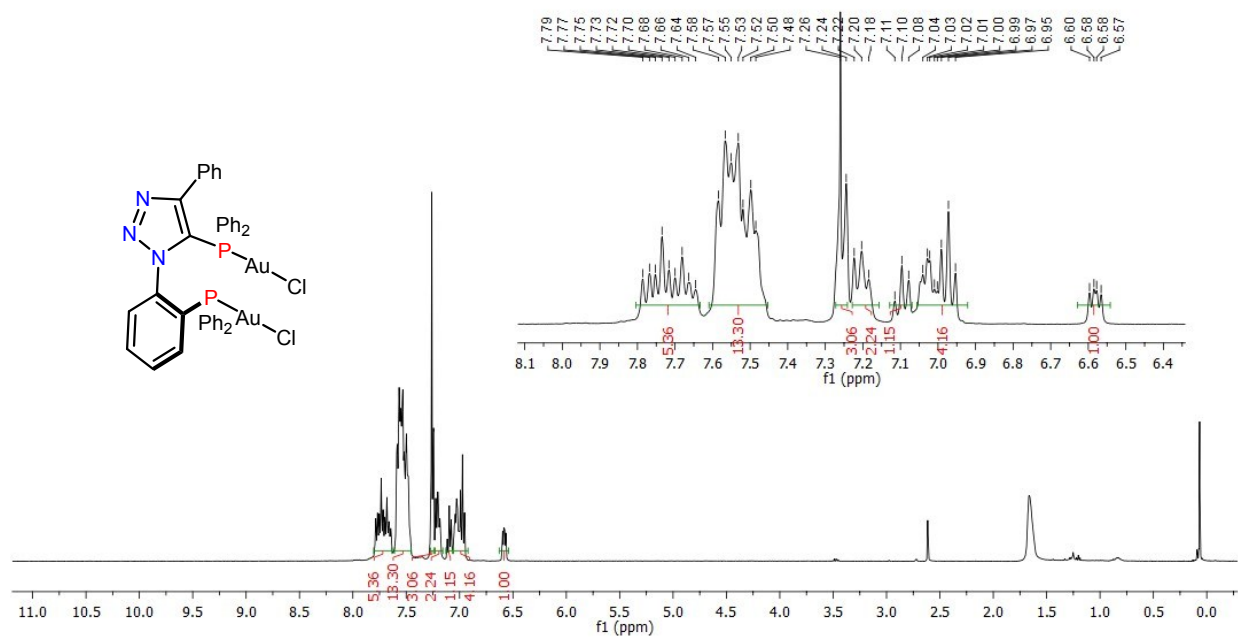

**Fig. S43** <sup>1</sup>H NMR spectrum of **12** in CDCl<sub>3</sub> (400 MHz)

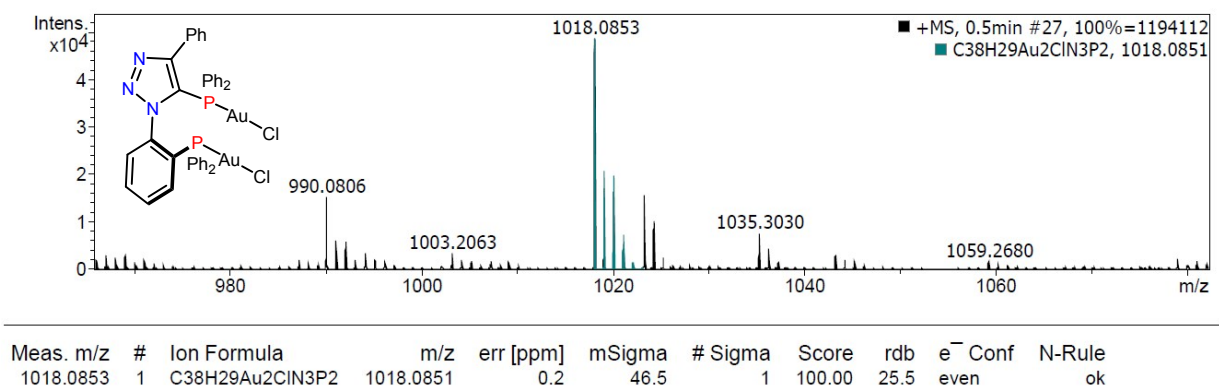

**Fig. S44** EI mass spectrum of **12**

| Meas. m/z | # | Ion Formula     | m/z       | err [ppm] | mSigma | # Sigma | Score  | rdb  | e <sup>-</sup> Conf | N-Rule |
|-----------|---|-----------------|-----------|-----------|--------|---------|--------|------|---------------------|--------|
| 1018.0853 | 1 | C38H29Au2ClN3P2 | 1018.0851 | 0.2       | 46.5   | 1       | 100.00 | 25.5 | even                | ok     |

**(5) NMR spectra of a-i and k**

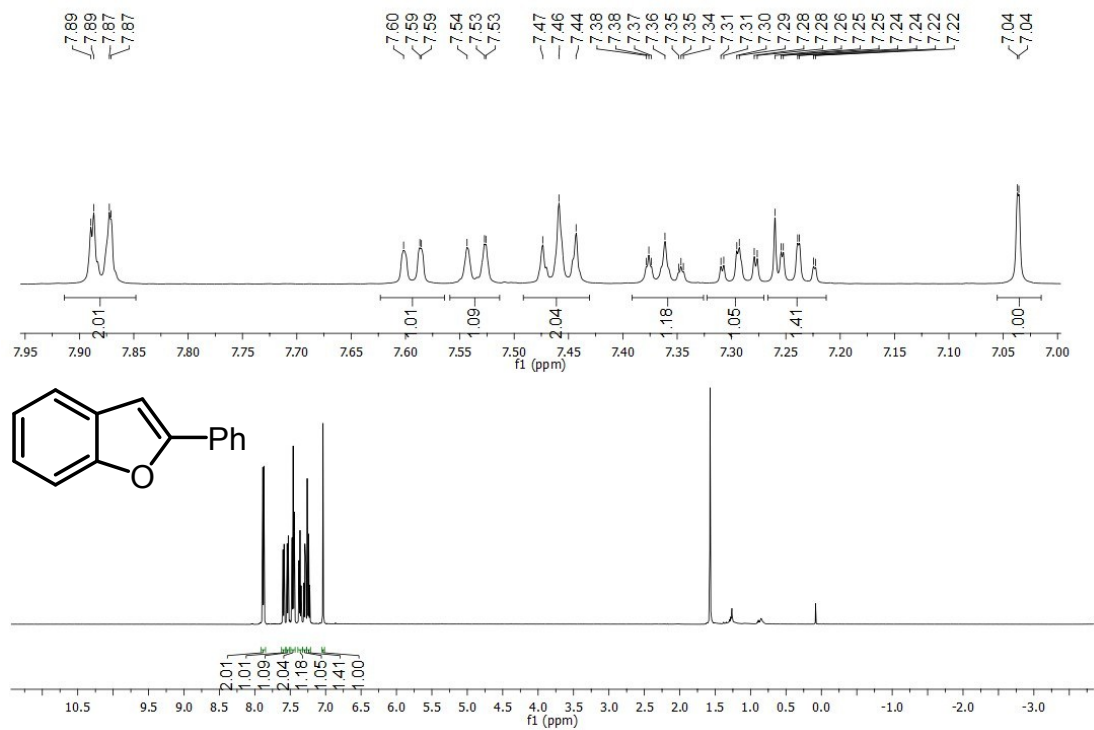

**Fig. S45** <sup>1</sup>H NMR spectrum of **a** in CDCl<sub>3</sub> (500 MHz)

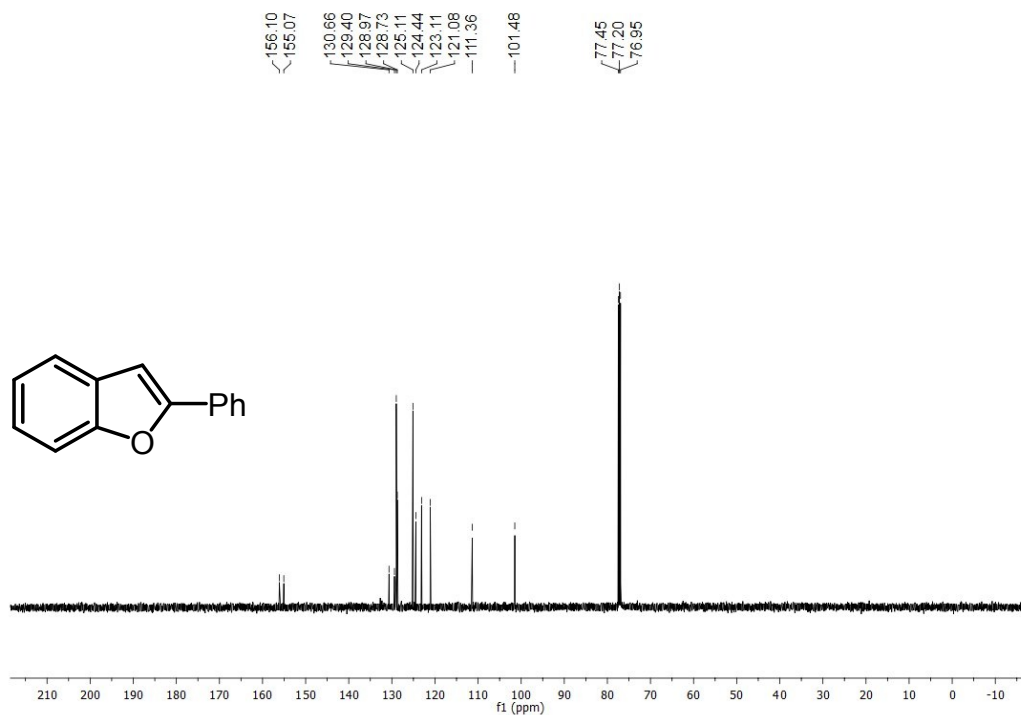

**Fig. S46** <sup>13</sup>C NMR spectrum of **a** in CDCl<sub>3</sub> (126 MHz)

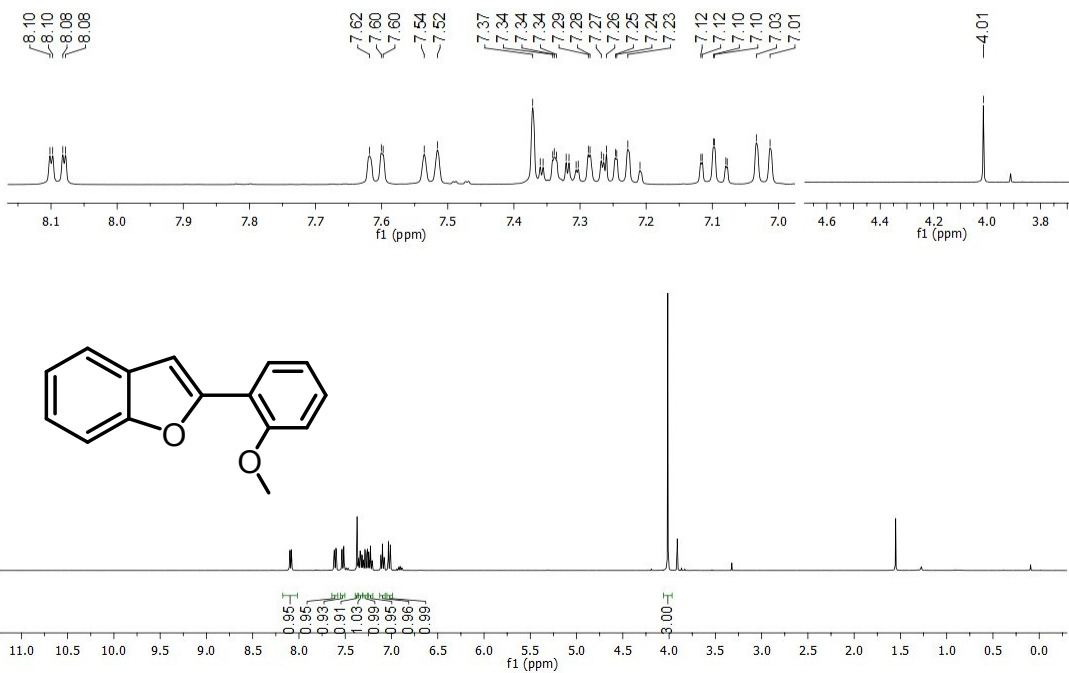

Fig. S47 <sup>1</sup>H NMR spectrum of **b** in CDCl<sub>3</sub> (400 MHz)

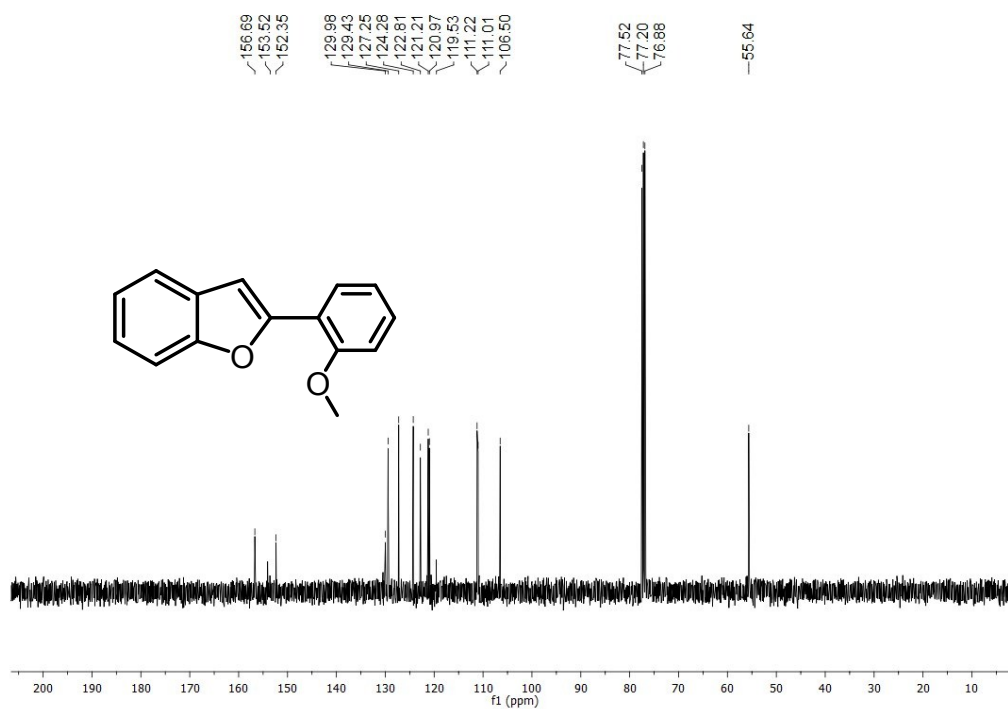

Fig. S48 <sup>13</sup>C NMR spectrum of **b** in CDCl<sub>3</sub> (100 MHz)

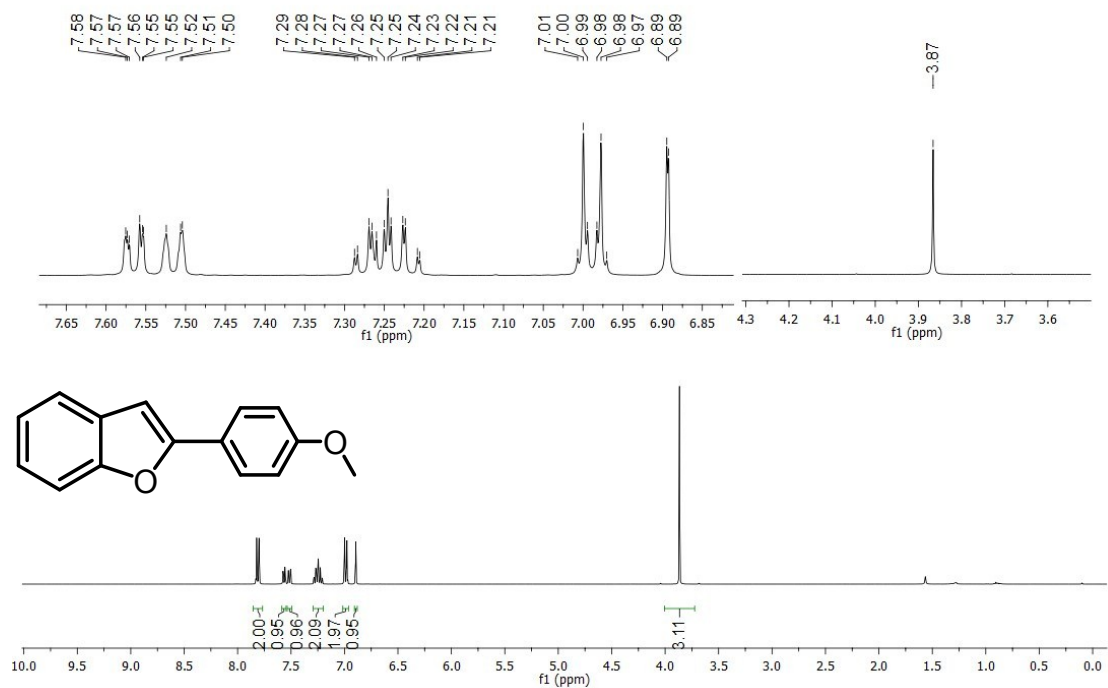

Fig. S49 <sup>1</sup>H NMR spectrum of **c** in CDCl<sub>3</sub> (400 MHz)

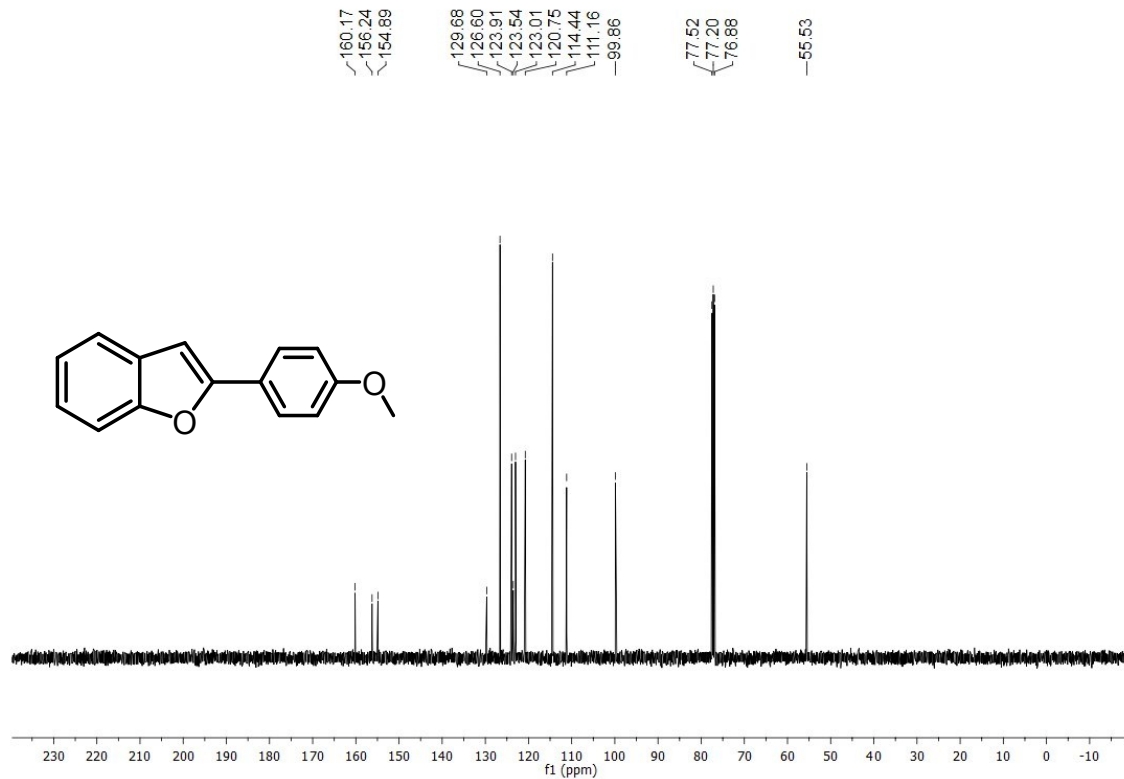

Fig. S50 <sup>13</sup>C NMR spectrum of **c** in CDCl<sub>3</sub> (100 MHz)

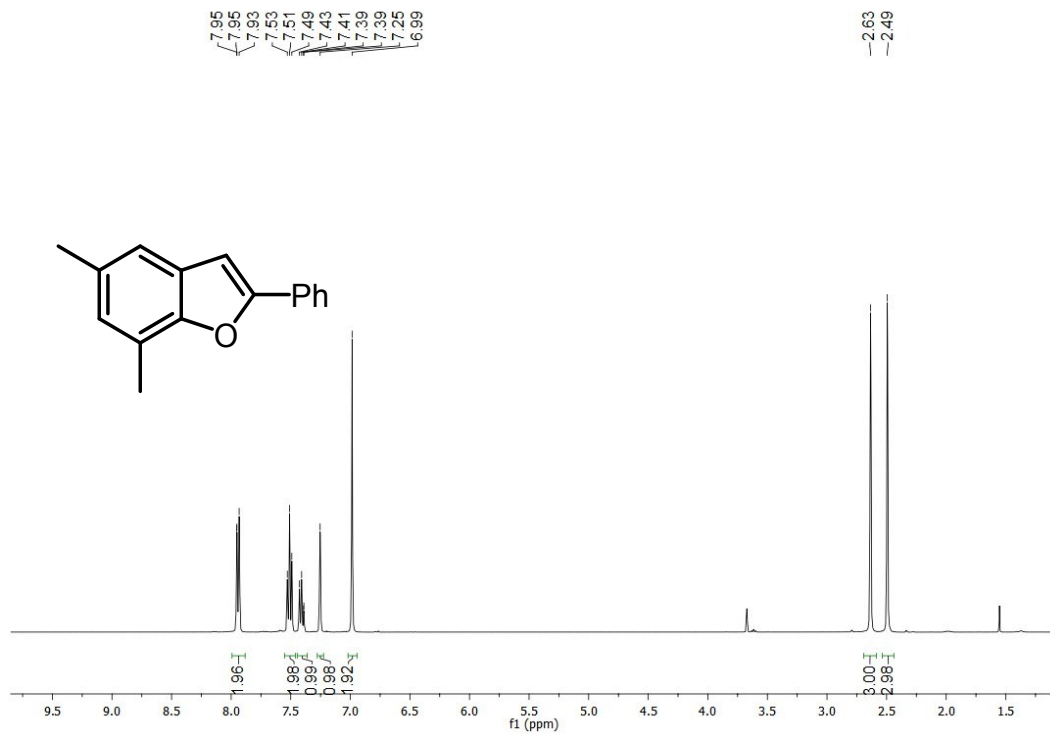

**Fig. S51** <sup>1</sup>H NMR spectrum of **d** in CDCl<sub>3</sub> (400 MHz)

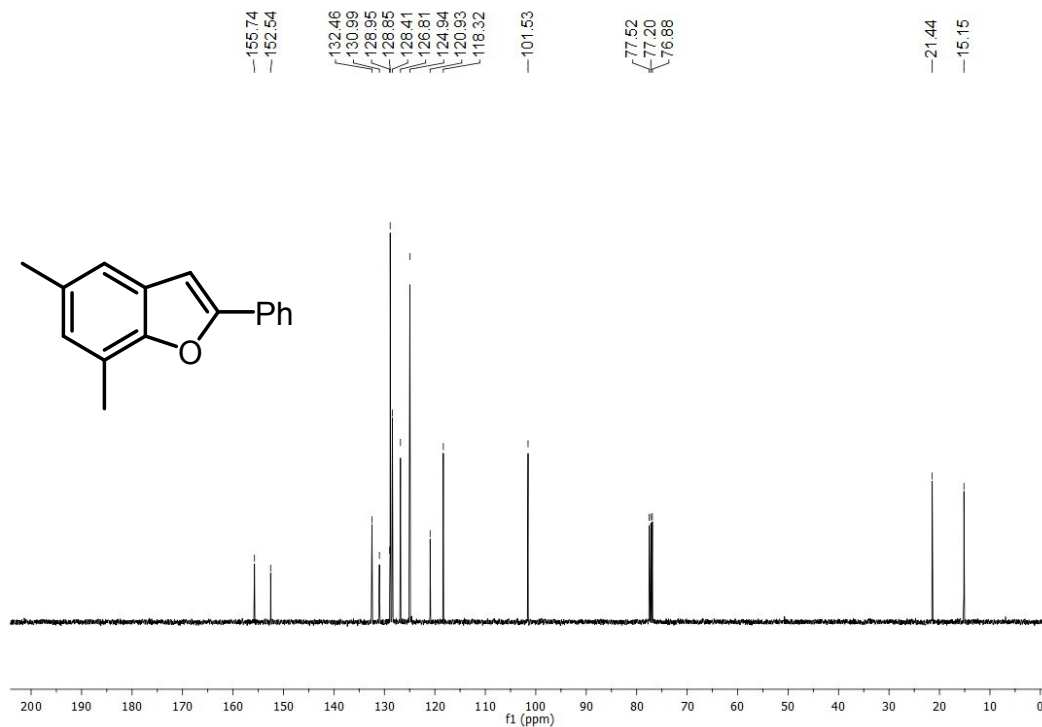

**Fig. S52** <sup>13</sup>C NMR spectrum of **d** in CDCl<sub>3</sub> (100 MHz)

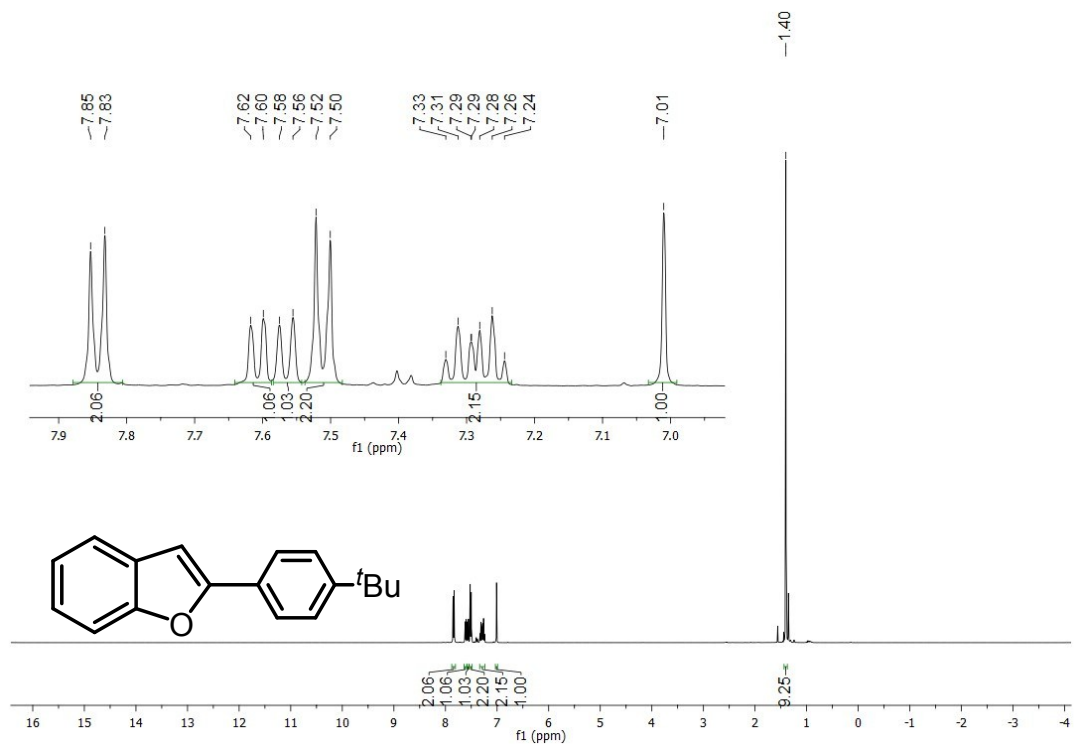

Fig. S53 <sup>1</sup>H NMR spectrum of **e** in CDCl<sub>3</sub> (400 MHz)

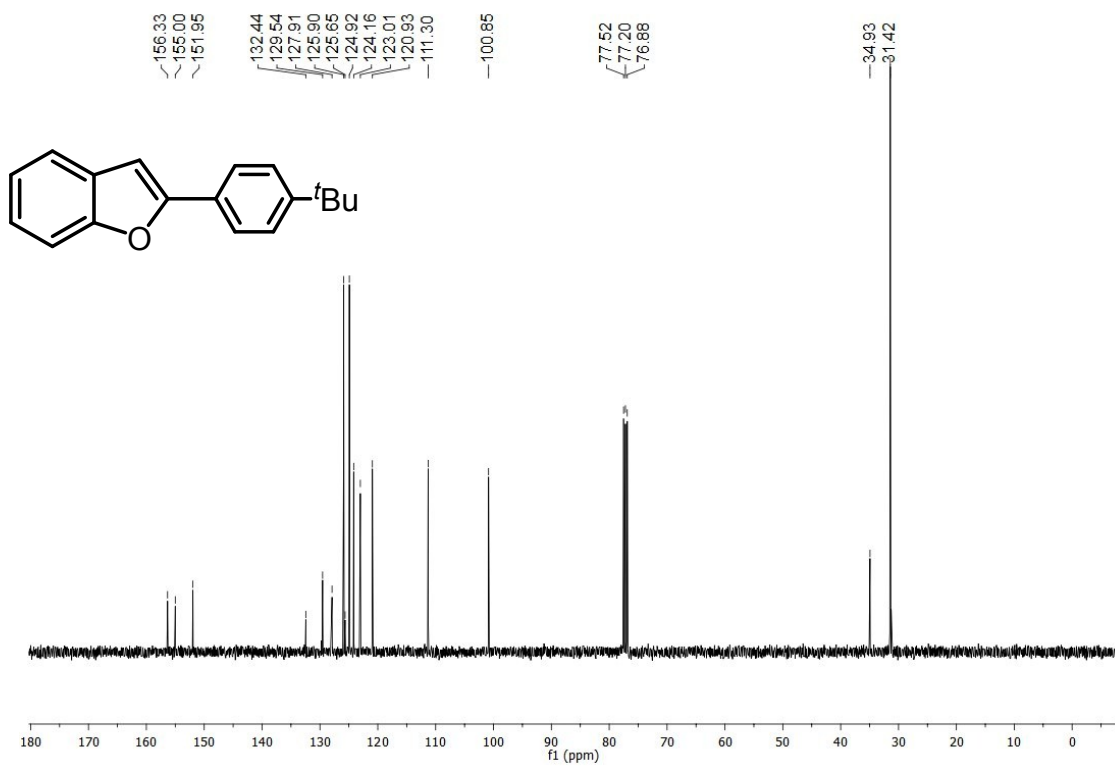

Fig. S54 <sup>13</sup>C NMR spectrum of **e** in CDCl<sub>3</sub> (100 MHz)



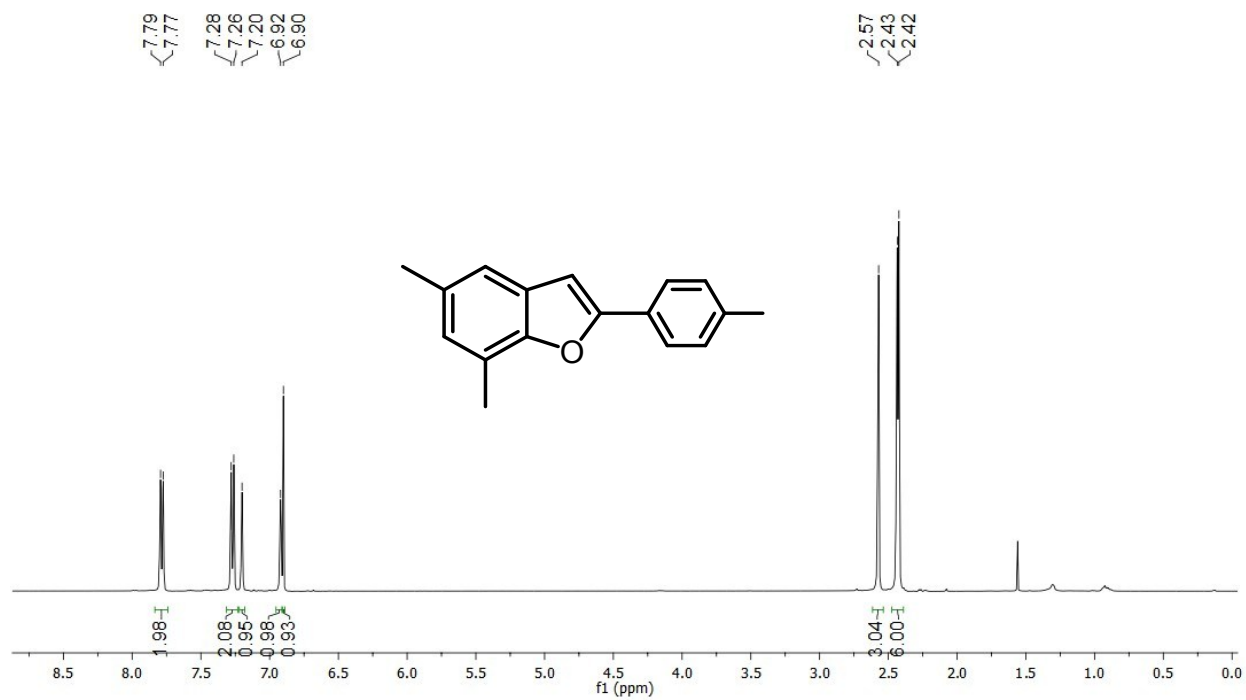

Fig. S55 <sup>1</sup>H NMR spectrum of **f** in CDCl<sub>3</sub> (400 MHz)

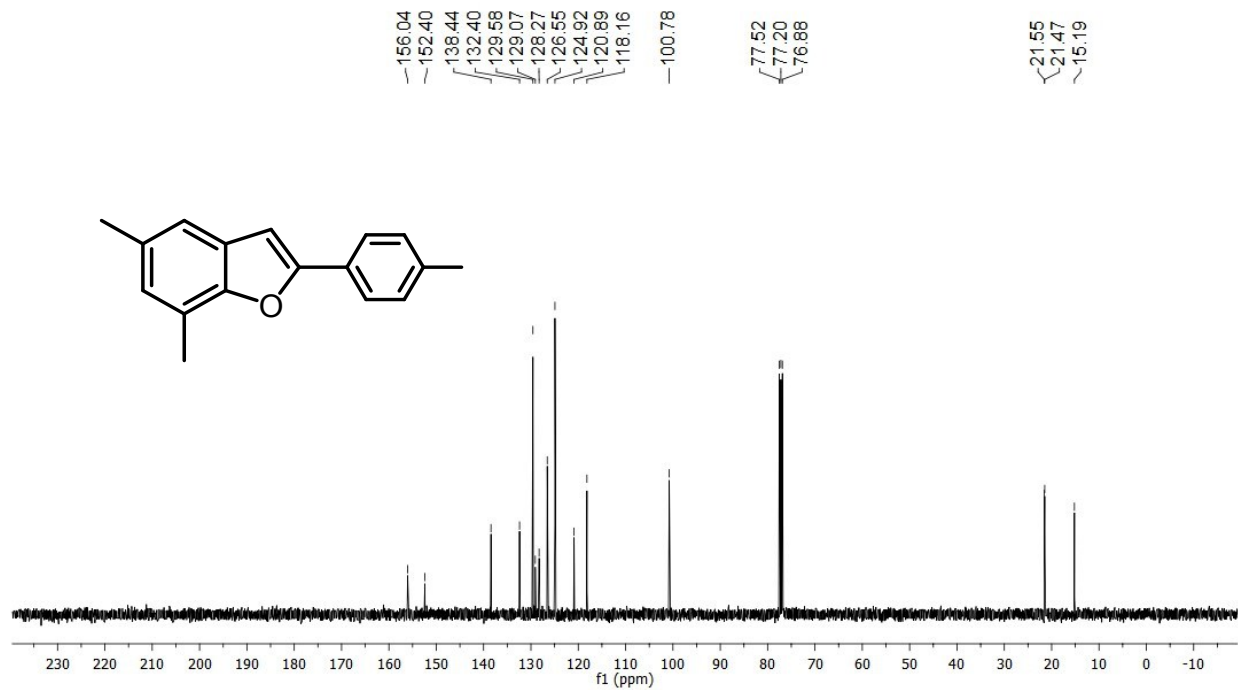

Fig. S56 <sup>13</sup>C NMR spectrum of **f** in CDCl<sub>3</sub> (100 MHz)

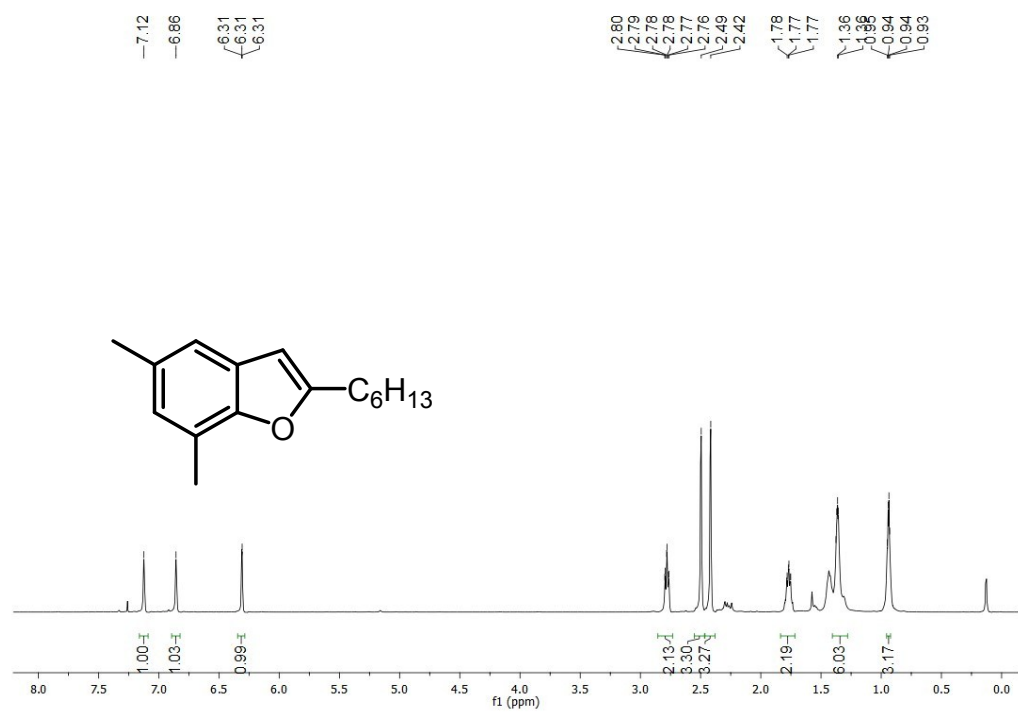

**Fig. S57**  $^1\text{H}$  NMR spectrum of **g** in  $\text{CDCl}_3$  (500 MHz)

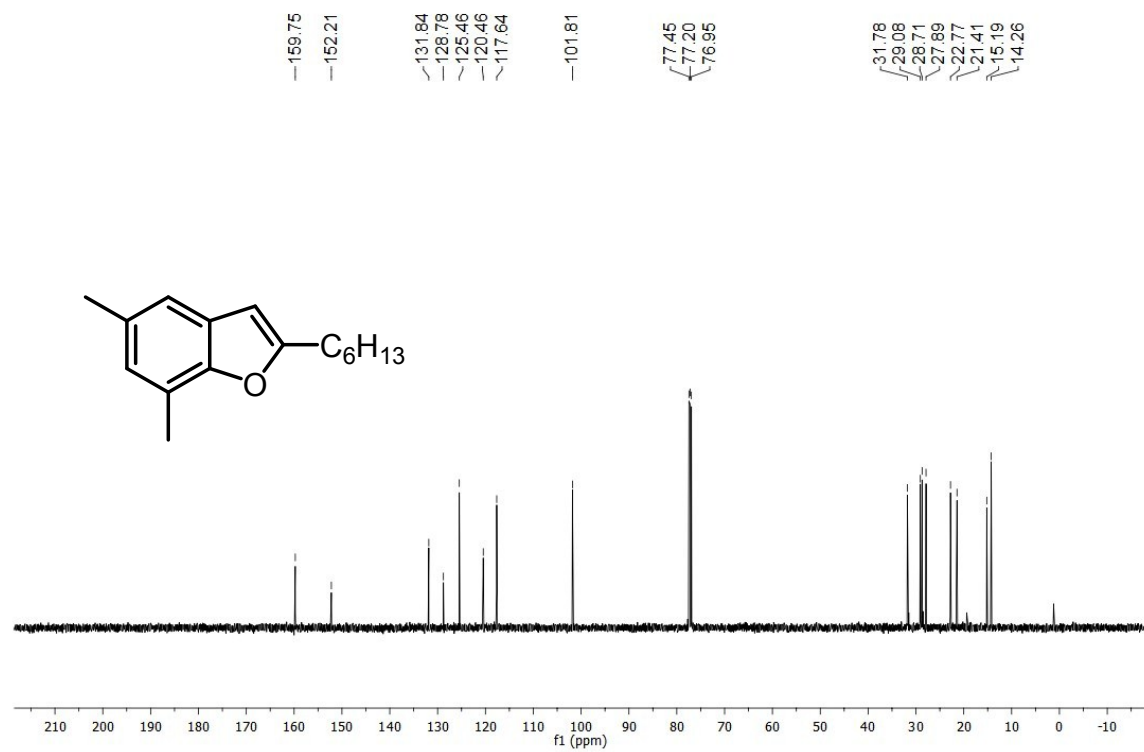

**Fig. S58**  $^{13}\text{C}$  NMR spectrum of **g** in  $\text{CDCl}_3$  (126 MHz)

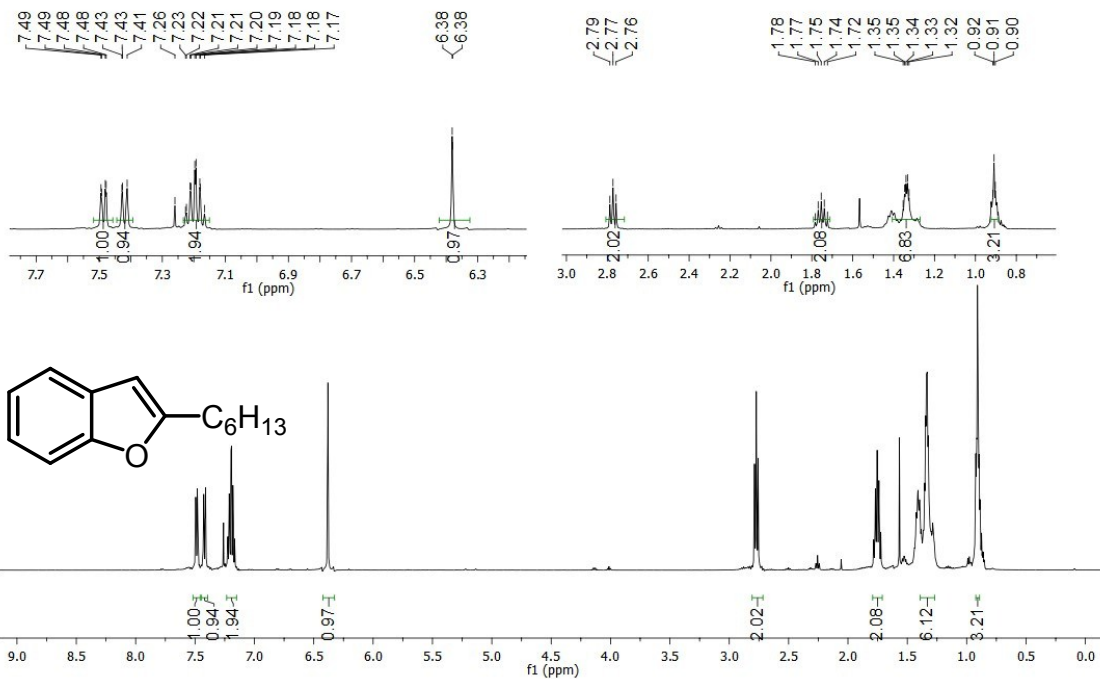

**Fig. S59** <sup>1</sup>H NMR spectrum of **h** in CDCl<sub>3</sub> (500 MHz)

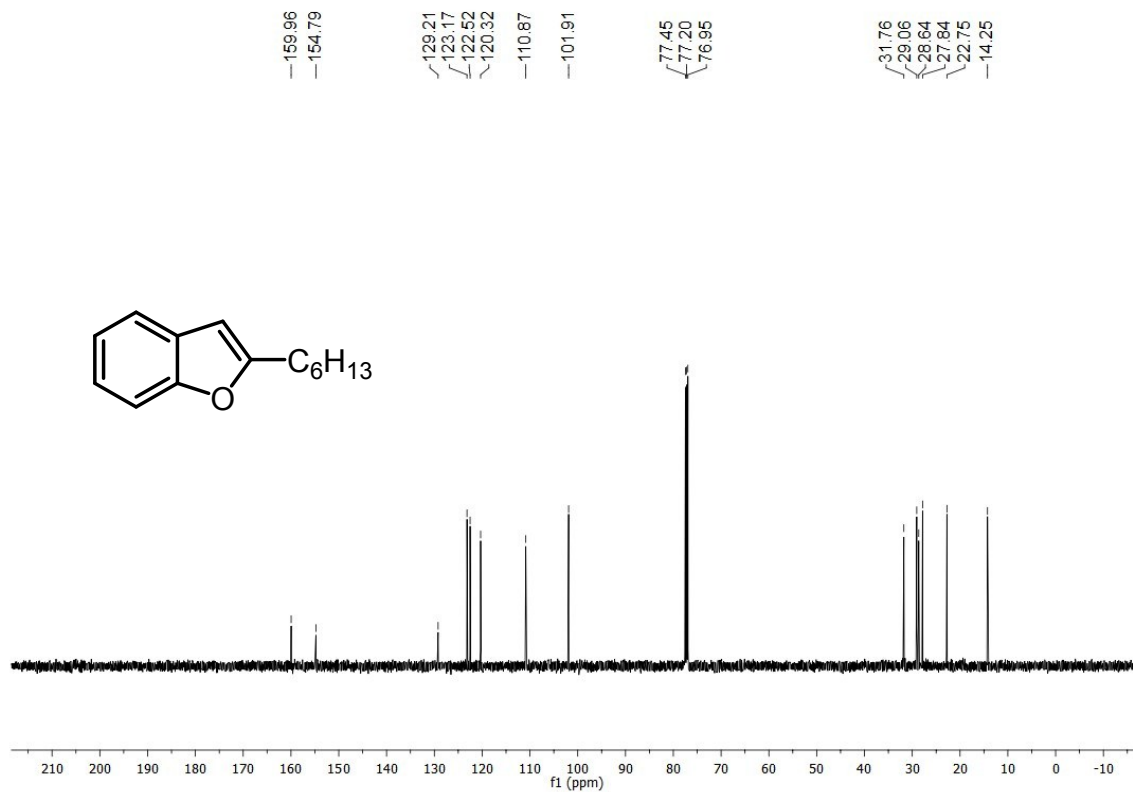

**Fig. S60** <sup>13</sup>C NMR spectrum of **h** in CDCl<sub>3</sub> (126 MHz)

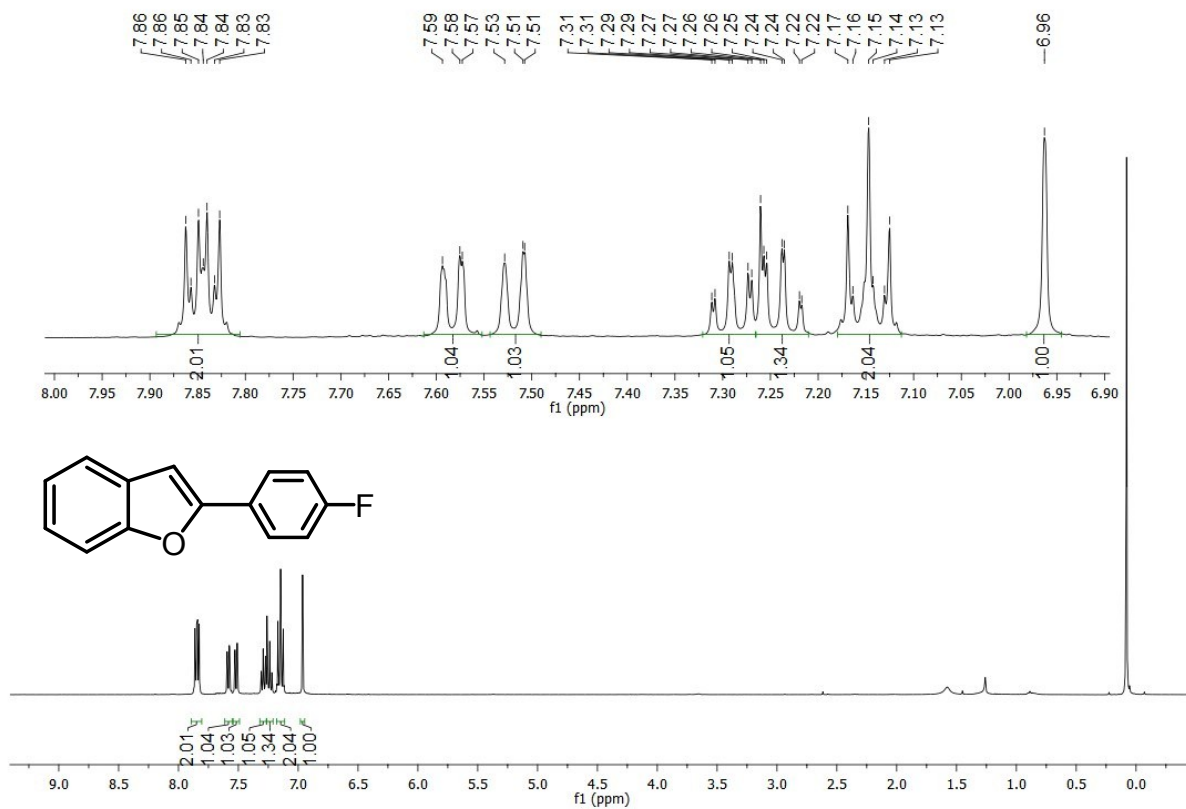

Fig. S61 <sup>1</sup>H NMR spectrum of **i** in CDCl<sub>3</sub> (400 MHz)

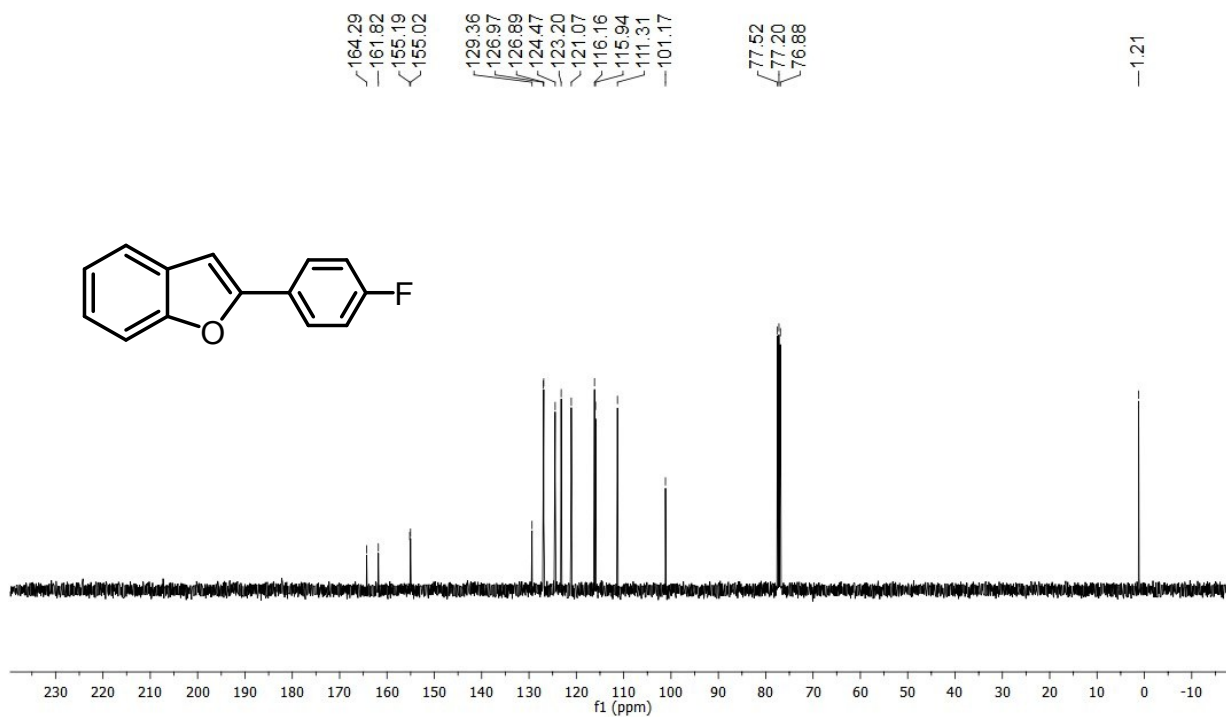

Fig. S62 <sup>13</sup>C NMR spectrum of **i** in CDCl<sub>3</sub> (100 MHz)

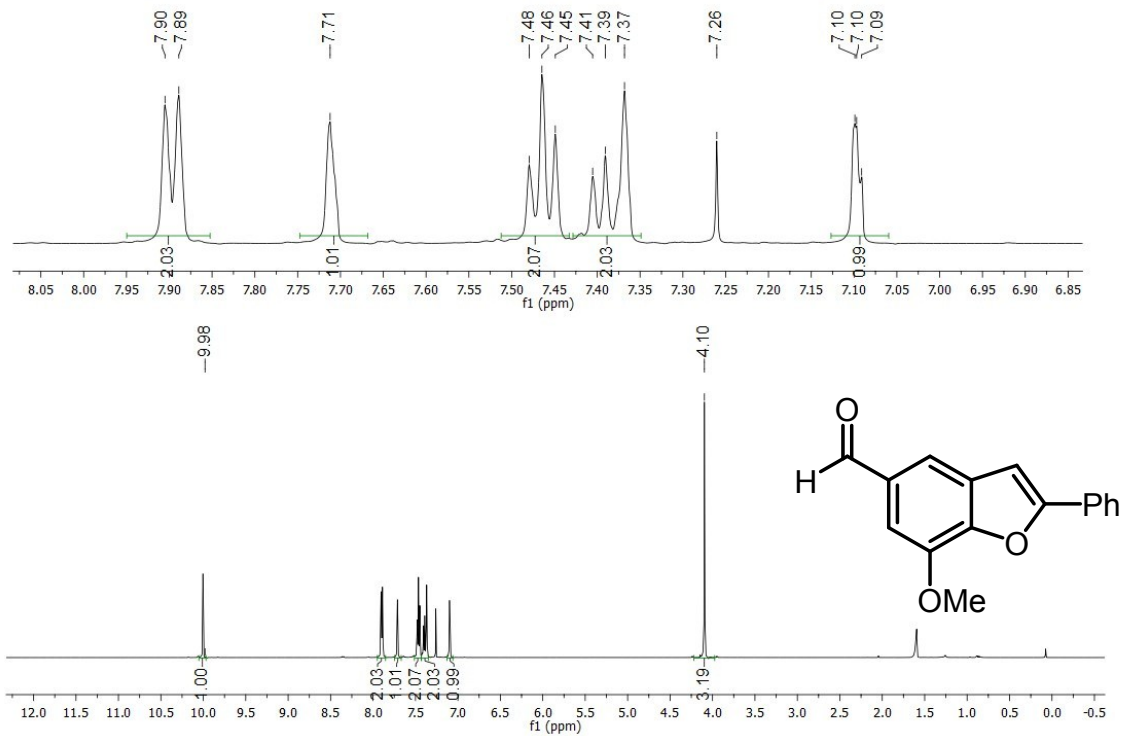

**Fig. S63** <sup>1</sup>H NMR spectrum of **k** in CDCl<sub>3</sub> (400 MHz)

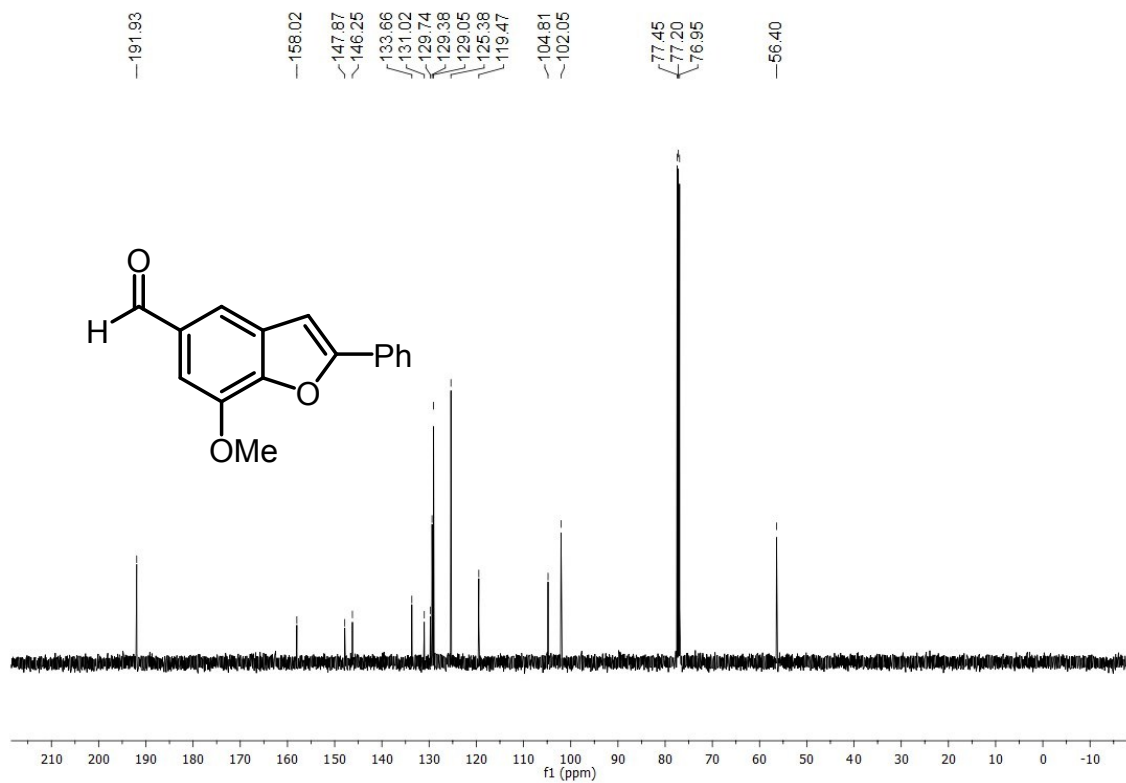

**Fig. S64** <sup>13</sup>C NMR spectrum of **k** in CDCl<sub>3</sub> (100 MHz)

**(6). Cartesian coordinates of optimized geometries of 3-6**

**Total electronic energies and Gibbs free energies (in a.u) and Cartesian coordinates of optimized geometries of 3-6 at the M06/6-31G\*\*, lanl2dz (Mo, W) level of theory.**

| 3                                            |              |              |              |
|----------------------------------------------|--------------|--------------|--------------|
| Zero-point correction=                       | 0.601737     |              |              |
| Thermal correction to Energy=                | 0.647798     |              |              |
| Thermal correction to Enthalpy=              | 0.648743     |              |              |
| Thermal correction to Gibbs Free Energy=     | 0.520580     |              |              |
| Sum of electronic and zero-point Energies=   | -2831.257341 |              |              |
| Sum of electronic and thermal Energies=      | -2831.211280 |              |              |
| Sum of electronic and thermal Enthalpies=    | -2831.210335 |              |              |
| Sum of electronic and thermal Free Energies= | -2831.338498 |              |              |
| P                                            | 11.437326000 | 7.908129000  | 9.578342000  |
| P                                            | 15.302934000 | 9.703889000  | 6.891941000  |
| O                                            | 15.198479000 | 13.491865000 | 8.257261000  |
| N                                            | 13.697080000 | 9.506659000  | 9.490891000  |
| C                                            | 14.106870000 | 7.965196000  | 10.965563000 |
| N                                            | 15.234388000 | 8.689890000  | 10.744364000 |
| O                                            | 18.573693000 | 8.149394000  | 9.351991000  |
| C                                            | 14.164473000 | 6.823744000  | 11.882645000 |
| C                                            | 13.090431000 | 8.466418000  | 10.151994000 |
| O                                            | 17.975992000 | 11.989129000 | 11.375772000 |
| C                                            | 14.864418000 | 7.917924000  | 6.858080000  |
| N                                            | 14.991432000 | 9.611862000  | 9.866300000  |
| C                                            | 15.805128000 | 6.977284000  | 7.282379000  |
| H                                            | 16.758924000 | 7.311092000  | 7.685845000  |
| C                                            | 13.629302000 | 7.473524000  | 6.366194000  |
| H                                            | 12.877974000 | 8.196626000  | 6.049406000  |

|   |              |              |              |
|---|--------------|--------------|--------------|
| C | 13.361375000 | 6.113351000  | 6.263810000  |
| H | 12.399404000 | 5.778351000  | 5.882714000  |
| C | 15.604129000 | 10.119562000 | 5.132319000  |
| C | 11.360391000 | 11.927453000 | 7.961191000  |
| H | 10.481247000 | 12.496699000 | 8.249988000  |
| C | 11.872501000 | 12.022618000 | 6.674650000  |
| H | 11.390654000 | 12.664466000 | 5.941415000  |
| C | 14.319540000 | 5.182316000  | 6.660162000  |
| H | 14.107117000 | 4.118279000  | 6.579324000  |
| C | 11.983897000 | 11.101948000 | 8.890411000  |
| H | 11.604344000 | 11.019311000 | 9.906912000  |
| C | 15.319217000 | 9.252237000  | 4.074710000  |
| H | 14.904409000 | 8.266066000  | 4.272327000  |
| C | 13.660125000 | 10.477314000 | 7.231933000  |
| C | 13.096005000 | 6.465790000  | 12.708135000 |
| H | 12.184118000 | 7.060166000  | 12.705165000 |
| C | 11.475193000 | 6.132489000  | 10.050236000 |
| C | 13.111314000 | 10.378966000 | 8.520794000  |
| C | 13.014292000 | 11.309071000 | 6.317886000  |
| H | 13.420007000 | 11.409946000 | 5.313107000  |
| C | 15.534711000 | 5.614226000  | 7.180564000  |
| H | 16.278861000 | 4.892018000  | 7.507804000  |
| C | 13.190733000 | 5.350880000  | 13.531893000 |
| H | 12.348461000 | 5.076905000  | 14.163038000 |
| C | 10.438451000 | 5.514907000  | 10.751912000 |
| H | 9.609715000  | 6.107711000  | 11.136411000 |
| C | 10.309723000 | 8.652634000  | 10.826715000 |
| C | 17.878707000 | 9.044598000  | 9.121954000  |
| C | 16.154344000 | 11.376804000 | 4.856388000  |
| H | 16.393645000 | 12.050750000 | 5.678230000  |
| C | 16.110902000 | 10.896076000 | 2.496804000  |

|   |              |              |              |
|---|--------------|--------------|--------------|
| H | 16.312762000 | 11.194784000 | 1.470735000  |
| C | 11.533733000 | 3.376100000  | 10.524168000 |
| H | 11.559362000 | 2.305985000  | 10.715933000 |
| C | 12.532038000 | 5.351551000  | 9.571681000  |
| H | 13.351504000 | 5.817666000  | 9.024353000  |
| C | 8.941342000  | 8.612577000  | 10.533755000 |
| H | 8.603625000  | 8.141485000  | 9.609858000  |
| C | 10.729779000 | 9.294519000  | 11.996095000 |
| H | 11.792328000 | 9.355213000  | 12.231259000 |
| C | 16.397477000 | 11.765813000 | 3.545107000  |
| H | 16.824658000 | 12.745222000 | 3.344717000  |
| C | 15.576078000 | 9.640158000  | 2.763434000  |
| H | 15.358956000 | 8.954590000  | 1.947526000  |
| C | 15.711686000 | 12.473886000 | 8.458332000  |
| C | 15.339245000 | 6.063703000  | 11.916223000 |
| H | 16.172288000 | 6.352552000  | 11.278052000 |
| C | 12.567756000 | 3.986391000  | 9.819031000  |
| H | 13.411237000 | 3.400037000  | 9.458868000  |
| C | 14.354859000 | 4.589231000  | 13.547698000 |
| H | 14.424769000 | 3.715191000  | 14.191164000 |
| C | 17.520638000 | 11.518575000 | 10.420689000 |
| C | 9.800289000  | 9.868490000  | 12.858818000 |
| H | 10.141910000 | 10.368920000 | 13.761929000 |
| C | 8.441141000  | 9.799669000  | 12.569818000 |
| H | 7.716770000  | 10.245244000 | 13.247377000 |
| C | 15.431591000 | 4.952770000  | 12.743700000 |
| H | 16.346674000 | 4.365360000  | 12.757811000 |
| C | 10.468094000 | 4.142703000  | 10.983354000 |
| H | 9.656787000  | 3.673300000  | 11.535548000 |
| C | 8.012082000  | 9.167851000  | 11.406349000 |
| H | 6.951673000  | 9.120817000  | 11.169539000 |



|    |              |              |             |
|----|--------------|--------------|-------------|
| O  | 19.031318000 | 11.831659000 | 6.960681000 |
| C  | 18.186103000 | 11.421128000 | 7.647190000 |
| Mo | 16.716673000 | 10.707627000 | 8.764840000 |

| 4                                            |              |             |              |
|----------------------------------------------|--------------|-------------|--------------|
| Zero-point correction=                       | 0.601087     |             |              |
| Thermal correction to Energy=                | 0.647064     |             |              |
| Thermal correction to Enthalpy=              | 0.648008     |             |              |
| Thermal correction to Gibbs Free Energy=     | 0.521132     |             |              |
| Sum of electronic and zero-point Energies=   | -2831.269011 |             |              |
| Sum of electronic and thermal Energies=      | -2831.223035 |             |              |
| Sum of electronic and thermal Enthalpies=    | -2831.222090 |             |              |
| Sum of electronic and thermal Free Energies= | -2831.348967 |             |              |
| Mo                                           | 8.978970000  | 3.742515000 | 10.537012000 |
| P                                            | 8.853286000  | 4.706306000 | 8.167555000  |
| P                                            | 9.354590000  | 6.168497000 | 11.362845000 |
| O                                            | 9.265549000  | 2.513760000 | 13.445419000 |
| O                                            | 12.054652000 | 2.936796000 | 10.107809000 |
| N                                            | 8.950755000  | 7.492448000 | 8.505872000  |
| O                                            | 5.862776000  | 4.292693000 | 11.106142000 |
| N                                            | 9.579441000  | 8.625708000 | 8.111397000  |
| N                                            | 10.598045000 | 8.280851000 | 7.401275000  |
| O                                            | 8.123911000  | 0.888892000 | 9.476648000  |
| C                                            | 6.231787000  | 3.964171000 | 7.640463000  |
| H                                            | 6.476832000  | 3.110456000 | 8.271642000  |
| C                                            | 7.186463000  | 4.959795000 | 7.418732000  |
| C                                            | 6.763725000  | 8.371635000 | 8.960146000  |
| H                                            | 6.766618000  | 8.721163000 | 7.931208000  |
| C                                            | 13.338804000 | 6.293568000 | 4.759152000  |
| H                                            | 13.692242000 | 6.736350000 | 3.830569000  |

|   |              |             |              |
|---|--------------|-------------|--------------|
| C | 7.948071000  | 7.212849000 | 10.751198000 |
| C | 6.870291000  | 7.513194000 | 11.588953000 |
| H | 6.899662000  | 7.203464000 | 12.630632000 |
| C | 13.962771000 | 5.159503000 | 5.272491000  |
| H | 14.802345000 | 4.712436000 | 4.744908000  |
| C | 4.973953000  | 4.048737000 | 7.054459000  |
| H | 4.240748000  | 3.267192000 | 7.237737000  |
| C | 10.109699000 | 7.262351000 | 13.884549000 |
| H | 10.849177000 | 7.851161000 | 13.347487000 |
| C | 12.263705000 | 6.862740000 | 5.429564000  |
| H | 11.771887000 | 7.752435000 | 5.042275000  |
| C | 7.859528000  | 7.646856000 | 9.417022000  |
| C | 9.652657000  | 3.773946000 | 6.794602000  |
| C | 10.666896000 | 6.919018000 | 7.315719000  |
| C | 10.023701000 | 7.377741000 | 15.268919000 |
| H | 10.694573000 | 8.055370000 | 15.791861000 |
| C | 9.264485000  | 6.390985000 | 13.191833000 |
| C | 9.091479000  | 6.631760000 | 15.979875000 |
| H | 9.028179000  | 6.722750000 | 17.061616000 |
| C | 6.864946000  | 6.034984000 | 6.586052000  |
| H | 7.600379000  | 6.815215000 | 6.391034000  |
| C | 9.580263000  | 6.382316000 | 7.999611000  |
| C | 5.760133000  | 8.213153000 | 11.129267000 |
| H | 4.942155000  | 8.425754000 | 11.812920000 |
| C | 5.704764000  | 8.649560000 | 9.812361000  |
| H | 4.846935000  | 9.208734000 | 9.448890000  |
| C | 10.821809000 | 7.174866000 | 10.911760000 |
| C | 10.777687000 | 8.574046000 | 10.909228000 |
| H | 9.847769000  | 9.089700000 | 11.147250000 |
| C | 8.338586000  | 5.634125000 | 13.921146000 |
| H | 7.683461000  | 4.934438000 | 13.404460000 |

|   |              |              |              |
|---|--------------|--------------|--------------|
| C | 10.835219000 | 2.322057000  | 4.720907000  |
| H | 11.302437000 | 1.761989000  | 3.914166000  |
| C | 13.515921000 | 4.604990000  | 6.468498000  |
| H | 14.001135000 | 3.724168000  | 6.883138000  |
| C | 10.236078000 | 2.532060000  | 7.044436000  |
| H | 10.239812000 | 2.128392000  | 8.053604000  |
| C | 4.655015000  | 5.132344000  | 6.243167000  |
| H | 3.668040000  | 5.205043000  | 5.792356000  |
| C | 9.158152000  | 2.981359000  | 12.390962000 |
| C | 12.022469000 | 6.533203000  | 10.603163000 |
| H | 12.074035000 | 5.446865000  | 10.607252000 |
| C | 8.245382000  | 5.759689000  | 15.301456000 |
| H | 7.518290000  | 5.163543000  | 15.847332000 |
| C | 10.244118000 | 3.556905000  | 4.459500000  |
| H | 10.247142000 | 3.962059000  | 3.450356000  |
| C | 9.645279000  | 4.271395000  | 5.486549000  |
| H | 9.182453000  | 5.232703000  | 5.268745000  |
| C | 12.441353000 | 5.173935000  | 7.139729000  |
| H | 12.102423000 | 4.750304000  | 8.083574000  |
| C | 5.603328000  | 6.122832000  | 6.007417000  |
| H | 5.361933000  | 6.970024000  | 5.369001000  |
| C | 8.458340000  | 1.929306000  | 9.869241000  |
| C | 11.794648000 | 6.297000000  | 6.618439000  |
| C | 10.955178000 | 3.270921000  | 10.257445000 |
| C | 11.910634000 | 9.311985000  | 10.590265000 |
| H | 11.858820000 | 10.397648000 | 10.575302000 |
| C | 13.097673000 | 8.662028000  | 10.266321000 |
| H | 13.978579000 | 9.240815000  | 9.999237000  |
| C | 6.981122000  | 4.114341000  | 10.877175000 |
| C | 10.822698000 | 1.807214000  | 6.010477000  |
| H | 11.272899000 | 0.839993000  | 6.220112000  |

|                                              |              |              |              |
|----------------------------------------------|--------------|--------------|--------------|
| C                                            | 13.154543000 | 7.273066000  | 10.276943000 |
| H                                            | 14.077510000 | 6.758645000  | 10.019972000 |
| <b>5</b>                                     |              |              |              |
| Zero-point correction=                       | 0.601806     |              |              |
| Thermal correction to Energy=                | 0.647836     |              |              |
| Thermal correction to Enthalpy=              | 0.648780     |              |              |
| Thermal correction to Gibbs Free Energy=     | 0.519964     |              |              |
| Sum of electronic and zero-point Energies=   | -2831.535655 |              |              |
| Sum of electronic and thermal Energies=      | -2831.489625 |              |              |
| Sum of electronic and thermal Enthalpies=    | -2831.488680 |              |              |
| Sum of electronic and thermal Free Energies= | -2831.617497 |              |              |
| W                                            | 16.706960000 | 10.671880000 | 8.780968000  |
| P                                            | 11.426449000 | 7.925961000  | 9.586146000  |
| P                                            | 15.303786000 | 9.708517000  | 6.898078000  |
| O                                            | 15.177707000 | 13.441928000 | 8.293440000  |
| N                                            | 13.704248000 | 9.497713000  | 9.489550000  |
| C                                            | 14.107494000 | 7.939933000  | 10.950598000 |
| N                                            | 15.244181000 | 8.644394000  | 10.720558000 |
| O                                            | 18.555969000 | 8.108311000  | 9.316586000  |
| C                                            | 14.158235000 | 6.791672000  | 11.859398000 |
| C                                            | 13.089462000 | 8.463164000  | 10.152401000 |
| O                                            | 17.931456000 | 11.898067000 | 11.428978000 |
| C                                            | 14.862789000 | 7.924011000  | 6.845721000  |
| N                                            | 15.007388000 | 9.574935000  | 9.847453000  |
| C                                            | 15.800678000 | 6.974136000  | 7.255899000  |
| H                                            | 16.758710000 | 7.296520000  | 7.658311000  |
| C                                            | 13.624218000 | 7.491519000  | 6.352083000  |
| H                                            | 12.875347000 | 8.221439000  | 6.045397000  |
| C                                            | 13.348112000 | 6.133881000  | 6.237560000  |
| H                                            | 12.383144000 | 5.808202000  | 5.856047000  |

|   |              |              |              |
|---|--------------|--------------|--------------|
| C | 15.629077000 | 10.142454000 | 5.149039000  |
| C | 11.376894000 | 11.943406000 | 7.984861000  |
| H | 10.502505000 | 12.516571000 | 8.280152000  |
| C | 11.886369000 | 12.045448000 | 6.697868000  |
| H | 11.407580000 | 12.697260000 | 5.971509000  |
| C | 14.301734000 | 5.193659000  | 6.622818000  |
| H | 14.082808000 | 4.131662000  | 6.533028000  |
| C | 11.997509000 | 11.107719000 | 8.907229000  |
| H | 11.621203000 | 11.022511000 | 9.924678000  |
| C | 15.363848000 | 9.277602000  | 4.084448000  |
| H | 14.952174000 | 8.288382000  | 4.272671000  |
| C | 13.663442000 | 10.484293000 | 7.238704000  |
| C | 13.092130000 | 6.440314000  | 12.690577000 |
| H | 12.187003000 | 7.044815000  | 12.698756000 |
| C | 11.453005000 | 6.145725000  | 10.040675000 |
| C | 13.118979000 | 10.380335000 | 8.528843000  |
| C | 13.022793000 | 11.327357000 | 6.332455000  |
| H | 13.428493000 | 11.434161000 | 5.328312000  |
| C | 15.521415000 | 5.613826000  | 7.142286000  |
| H | 16.262982000 | 4.884513000  | 7.459321000  |
| C | 13.181264000 | 5.319413000  | 13.506790000 |
| H | 12.341013000 | 5.050480000  | 14.142752000 |
| C | 10.417909000 | 5.530195000  | 10.746537000 |
| H | 9.597818000  | 6.126205000  | 11.144407000 |
| C | 10.312597000 | 8.669256000  | 10.846939000 |
| C | 17.863961000 | 9.014072000  | 9.108202000  |
| C | 16.174979000 | 11.404696000 | 4.887761000  |
| H | 16.397982000 | 12.076890000 | 5.715426000  |
| C | 16.168784000 | 10.932584000 | 2.525758000  |
| H | 16.383956000 | 11.236880000 | 1.504048000  |
| C | 11.494471000 | 3.385191000  | 10.490216000 |

|   |              |              |              |
|---|--------------|--------------|--------------|
| H | 11.513717000 | 2.313337000  | 10.672702000 |
| C | 12.498845000 | 5.360798000  | 9.544591000  |
| H | 13.316659000 | 5.825309000  | 8.993247000  |
| C | 8.942194000  | 8.639665000  | 10.562363000 |
| H | 8.595430000  | 8.175770000  | 9.638180000  |
| C | 10.744478000 | 9.302069000  | 12.016934000 |
| H | 11.808863000 | 9.354353000  | 12.245716000 |
| C | 16.434895000 | 11.799783000 | 3.581569000  |
| H | 16.859253000 | 12.782374000 | 3.391294000  |
| C | 15.637154000 | 9.672539000  | 2.778712000  |
| H | 15.435872000 | 8.989295000  | 1.956877000  |
| C | 15.702496000 | 12.426983000 | 8.494979000  |
| C | 15.324769000 | 6.018411000  | 11.878125000 |
| H | 16.155847000 | 6.302603000  | 11.235230000 |
| C | 12.526556000 | 3.993465000  | 9.780356000  |
| H | 13.361919000 | 3.403675000  | 9.407210000  |
| C | 14.336846000 | 4.544708000  | 13.508027000 |
| H | 14.402129000 | 3.665900000  | 14.145451000 |
| C | 17.488461000 | 11.447027000 | 10.456171000 |
| C | 9.824194000  | 9.878002000  | 12.888296000 |
| H | 10.174856000 | 10.371330000 | 13.791836000 |
| C | 8.462898000  | 9.819831000  | 12.607405000 |
| H | 7.745796000  | 10.266922000 | 13.291657000 |
| C | 15.411167000 | 4.901229000  | 12.697631000 |
| H | 16.319663000 | 4.303570000  | 12.700758000 |
| C | 10.438819000 | 4.155743000  | 10.965465000 |
| H | 9.629022000  | 3.687765000  | 11.521041000 |
| C | 8.022207000  | 9.196714000  | 11.443559000 |
| H | 6.960050000  | 9.157920000  | 11.213242000 |
| O | 19.019617000 | 11.830565000 | 6.994698000  |
| C | 18.175916000 | 11.405586000 | 7.677943000  |

## 6

|                                              |              |
|----------------------------------------------|--------------|
| Zero-point correction=                       | 0.602149     |
| Thermal correction to Energy=                | 0.647750     |
| Thermal correction to Enthalpy=              | 0.648694     |
| Thermal correction to Gibbs Free Energy=     | 0.522955     |
| Sum of electronic and zero-point Energies=   | -2831.548543 |
| Sum of electronic and thermal Energies=      | -2831.502941 |
| Sum of electronic and thermal Enthalpies=    | -2831.501997 |
| Sum of electronic and thermal Free Energies= | -2831.627736 |

|   |              |             |              |
|---|--------------|-------------|--------------|
| W | 1.834967000  | 3.734001000 | 10.479670000 |
| P | 1.732798000  | 4.726034000 | 8.134981000  |
| P | 2.197840000  | 6.135025000 | 11.325713000 |
| C | -2.128458000 | 4.044549000 | 6.972915000  |
| H | -2.858890000 | 3.258304000 | 7.146653000  |
| C | -0.878396000 | 3.968009000 | 7.576406000  |
| H | -0.637177000 | 3.115631000 | 8.210420000  |
| C | -0.152790000 | 4.098990000 | 10.819283000 |
| O | 4.906507000  | 2.992685000 | 9.978985000  |
| C | 3.705772000  | 7.084261000 | 10.891260000 |
| O | -1.273628000 | 4.284659000 | 11.040207000 |
| N | 3.397632000  | 8.332841000 | 7.350284000  |
| C | 4.923439000  | 6.401774000 | 10.814410000 |
| H | 4.957324000  | 5.327100000 | 10.978852000 |
| C | 0.072730000  | 4.969751000 | 7.367638000  |
| N | 1.776294000  | 7.510933000 | 8.469218000  |
| N | 2.365589000  | 8.657044000 | 8.051322000  |
| O | 2.148908000  | 2.468581000 | 13.363986000 |
| C | 3.686876000  | 8.468390000 | 10.699139000 |

|   |              |              |              |
|---|--------------|--------------|--------------|
| H | 2.749623000  | 9.018848000  | 10.764329000 |
| C | 3.800747000  | 3.294268000  | 10.166995000 |
| C | 4.860875000  | 9.150113000  | 10.398378000 |
| H | 4.827307000  | 10.222177000 | 10.221531000 |
| C | 0.694191000  | 7.643856000  | 9.392157000  |
| O | 0.997033000  | 0.898459000  | 9.369401000  |
| C | -2.442775000 | 5.125252000  | 6.156271000  |
| H | -3.423658000 | 5.191147000  | 5.691383000  |
| C | 2.915257000  | 7.293085000  | 13.819603000 |
| H | 3.620137000  | 7.906637000  | 13.263133000 |
| C | -1.497540000 | 6.121647000  | 5.933130000  |
| H | -1.735189000 | 6.966658000  | 5.290535000  |
| C | 3.514768000  | 6.972997000  | 7.296246000  |
| C | 4.672001000  | 6.367334000  | 6.636024000  |
| C | 5.155382000  | 6.918979000  | 5.446294000  |
| H | 4.654093000  | 7.789809000  | 5.029172000  |
| C | 6.255847000  | 6.357759000  | 4.811597000  |
| H | 6.622180000  | 6.788823000  | 3.882496000  |
| C | 1.937044000  | 6.658647000  | 15.932013000 |
| H | 1.873866000  | 6.769808000  | 17.011898000 |
| C | -0.271026000 | 7.483069000  | 11.572183000 |
| H | -0.230822000 | 7.161609000  | 12.609731000 |
| C | 5.328405000  | 5.268791000  | 7.196831000  |
| H | 4.984170000  | 4.862794000  | 8.146733000  |
| C | 2.112333000  | 6.363331000  | 13.152658000 |
| C | -0.243662000 | 6.042648000  | 6.529503000  |
| H | 0.487718000  | 6.829186000  | 6.344276000  |
| C | 6.097060000  | 7.086873000  | 10.522362000 |
| H | 7.035061000  | 6.541551000  | 10.451695000 |
| C | 1.222607000  | 5.582185000  | 13.899461000 |
| H | 0.593888000  | 4.848615000  | 13.397808000 |



|   |              |             |              |
|---|--------------|-------------|--------------|
| C | 2.828311000  | 7.435475000 | 15.200925000 |
| H | 3.464954000  | 8.158081000 | 15.706064000 |
| C | 0.801576000  | 7.198349000 | 10.721681000 |
| C | 6.064664000  | 8.460422000 | 10.303356000 |
| H | 6.978787000  | 8.994261000 | 10.055028000 |
| C | -0.412967000 | 8.362029000 | 8.952502000  |
| H | -0.423909000 | 8.717957000 | 7.925931000  |
| C | 2.442762000  | 6.413322000 | 7.986224000  |
| C | 1.130080000  | 5.732995000 | 15.277518000 |
| H | 0.434010000  | 5.116101000 | 15.840413000 |
| C | 2.028599000  | 2.947649000 | 12.313489000 |
| C | 3.209370000  | 3.640675000 | 4.442856000  |
| H | 3.232889000  | 4.064307000 | 3.441588000  |
| C | 6.425092000  | 4.705230000 | 6.557643000  |
| H | 6.916183000  | 3.841615000 | 7.000882000  |
| C | 2.580617000  | 4.331913000 | 5.467708000  |
| H | 2.114176000  | 5.292229000 | 5.253904000  |
| C | -1.391722000 | 8.177345000 | 11.130440000 |
| H | -2.204445000 | 8.375471000 | 11.824490000 |
| C | 1.324779000  | 1.935194000 | 9.783626000  |
| C | 3.805753000  | 2.406884000 | 4.696521000  |
| H | 4.298217000  | 1.865878000 | 3.891788000  |
| C | 6.887166000  | 5.244274000 | 5.360211000  |
| H | 7.745413000  | 4.802134000 | 4.859087000  |
| C | 3.146463000  | 2.569014000 | 7.007651000  |
| H | 3.125226000  | 2.142902000 | 8.006590000  |
| C | -1.465009000 | 8.623918000 | 9.817956000  |
| H | -2.331976000 | 9.177408000 | 9.467751000  |
| C | 2.562986000  | 3.812707000 | 6.767343000  |
| C | 3.764180000  | 1.868229000 | 5.975491000  |
| H | 4.215417000  | 0.900216000 | 6.178875000  |

## References

1. R. Zhou, W. Wang, Z.-j. Jiang, K. Wang, X.-l. Zheng, H.-y. Fu, H. Chen and R.-x. Li, *Chem. Commun.*, 2014, **50**, 6023-6026.
2. M. Jacubert, O. Provot, J.-F. Peyrat, A. Hamze, J.-D. Brion and M. Alami, *Tetrahedron*, 2010, **66**, 3775-3787.
3. J. Liu, W. Chen, Y. Ji and L. Wang, *Adv. Synth. Catal.*, 2012, **354**, 1585-1592.
4. J. Bonnamour, M. Piedrafita and C. Bolm, *Adv. Synth. Catal.*, 2010, **352**, 1577-1581.
5. R. Wang, S. Mo, Y. Lu and Z. Shen, *Adv. Synth. Catal.*, 2011, **353**, 713-718.
6. A. Arcadi, F. Marinelli and S. Cacchi, *Synthesis*, 1986, **1986**, 749-751.
7. C. Y. Legault, CYLview, 1.0 b; Université de Sherbrooke, Quebec, Canada, 2009 (<http://www.cylview.org>).
